# Supplementary material for: Multiple Sporadic Colorectal Cancers Display a Unique Methylation Phenotype
Source: PubMed Central journal article supplement (PMC3958343; doi:10.1371/journal.pone.0091033), 2014-03-18
Supplement: pone.0091033.s004.pdf [file pone.0091033.s004.pdf]

**Supplementary Table 3.** Hypermethylated CpG sites found in CIMP-H versus CIMP-0/L tumors based on the Infinium DNA methylation assay.

| TargetID   | Symbol   | beta.dif | beta.CIMP-H | beta.CIMP-L/0 | p        | OR          | ci.low      | ci.high     |
|------------|----------|----------|-------------|---------------|----------|-------------|-------------|-------------|
| cg13384396 | ADCY5    | 0,2941   | 0,5064      | 0,2123        | 0,001081 | 40194,2172  | 69,7236     | 23171145,88 |
| cg09156233 | BMPR1B   | 0,2793   | 0,4363      | 0,157         | 0,001104 | 1936845,305 | 323,725     | 11588135569 |
| cg15309006 | LOC63928 | 0,1783   | 0,3061      | 0,1278        | 0,001239 | 290685652,6 | 2126,0627   | 3,9744E+13  |
| cg11896271 | PANX2    | 0,2814   | 0,4663      | 0,1849        | 0,001311 | 17863,8323  | 45,5662     | 7003357,54  |
| cg07558455 | ANKRD38  | 0,2344   | 0,3706      | 0,1362        | 0,001364 | 1218142,537 | 229,5061    | 6465497975  |
| cg14580567 | HHIP     | 0,377    | 0,5022      | 0,1253        | 0,001487 | 1707,1756   | 17,3136     | 168332,4392 |
| cg04759439 | CAST1    | 0,2736   | 0,5773      | 0,3037        | 0,001734 | 3978,9664   | 22,251      | 711526,0922 |
| cg02250594 | ONECUT2  | 0,2602   | 0,5847      | 0,3245        | 0,001893 | 19318,2687  | 38,188      | 9772589,523 |
| cg18454685 | CACNA1G  | 0,3456   | 0,5077      | 0,1621        | 0,001984 | 2928,9508   | 18,6079     | 461026,4384 |
| cg25920792 | HTRA1    | 0,3495   | 0,4613      | 0,1118        | 0,002003 | 73115,0455  | 60,0698     | 88993315,36 |
| cg20937139 | PDGFC    | 0,2459   | 0,4643      | 0,2184        | 0,002108 | 10905,2101  | 29,0934     | 4087652,47  |
| cg22578204 | TIMP3    | 0,3028   | 0,4754      | 0,1726        | 0,002495 | 177340,5451 | 70,2741     | 447528474   |
| cg07102705 | HTR4     | 0,3078   | 0,4726      | 0,1648        | 0,002735 | 364012,5701 | 83,7695     | 1581782852  |
| cg23695504 | FLJ45717 | 0,1972   | 0,4537      | 0,2565        | 0,00285  | 1420502,272 | 129,0382    | 15637433080 |
| cg01530101 | KCNQ1DN  | 0,1716   | 0,5991      | 0,4275        | 0,002988 | 37597532,18 | 375,3724    | 3,76579E+12 |
| cg24120841 | THRB     | 0,1155   | 0,2269      | 0,1114        | 0,003239 | 4           | 811175,372  | 2           |
| cg25202471 | TFAP2A   | 0,2093   | 0,3903      | 0,181         | 0,003264 | 91024,747   | 45,194      | 183331805,3 |
| cg23771929 | FREQ     | 0,1063   | 0,3548      | 0,2485        | 0,003302 | 2658391623  | 1373,0899   | 5           |
| cg23146358 | CDKN1C   | 0,114    | 0,1821      | 0,0682        | 0,003454 | 25579575201 | 2702,424    | 2           |
| cg01468621 | BRSK2    | 0,2907   | 0,5211      | 0,2304        | 0,003509 | 813,3441    | 9,0437      | 73148,3531  |
| cg26055770 | PDZRN3   | 0,123    | 0,3249      | 0,2018        | 0,00364  | 28162994283 | 2547,5787   | 3           |
| cg14717170 | SLITRK3  | 0,1062   | 0,2909      | 0,1847        | 0,00375  | 691490959,8 | 728,0856    | 6,56736E+14 |
| cg00666746 | SYDE1    | 0,1376   | 0,3765      | 0,2388        | 0,003755 | 12525658,67 | 198,4158    | 7,90724E+11 |
| cg18618334 | CXCL12   | 0,1922   | 0,3972      | 0,2049        | 0,003762 | 1394250,107 | 97,2866     | 19981509248 |
| cg20380069 | MSI1     | 0,1461   | 0,293       | 0,1469        | 0,00394  | 1,327E+13   | 15895,7782  | 1           |
| cg22747092 | BTBD14A  | 0,1026   | 0,3525      | 0,2499        | 0,004011 | 13448628648 | 1695,1805   | 1           |
| cg22375192 | IGF1R    | 0,1998   | 0,3276      | 0,1278        | 0,004085 | 383335,4111 | 59,2247     | 2481159791  |
| cg01697732 | FAM20A   | 0,4785   | 0,6321      | 0,1536        | 0,004116 | 115,4331    | 4,5032      | 2958,9345   |
| cg25957124 | DNAH3    | 0,1089   | 0,3249      | 0,216         | 0,004152 | 1283530220  | 759,1609    | 2           |
| cg03310469 | SIX2     | 0,1601   | 0,2347      | 0,0746        | 0,004167 | 20802950045 | 1820,0809   | 2           |
| cg02441647 | COL8A1   | 0,1839   | 0,4081      | 0,2242        | 0,004229 | 17157,1371  | 21,5354     | 13668971,79 |
| cg08528984 | PRDM16   | 0,3063   | 0,4271      | 0,1208        | 0,004493 | 685,6884    | 7,5809      | 62020,0378  |
| cg12277666 | TDRD5    | 0,1119   | 0,33        | 0,2181        | 0,004513 | 16697649,34 | 172,9228    | 1,61235E+12 |
| cg12949975 | GDF7     | 0,2469   | 0,3424      | 0,0954        | 0,004759 | 2100,3445   | 10,3652     | 425600,4664 |
| cg00468146 | ID4      | 0,1327   | 0,3589      | 0,2262        | 0,004772 | 109245,7372 | 34,6021     | 344910169,8 |
| cg25741452 | KITLG    | 0,1116   | 0,2273      | 0,1157        | 0,004773 | 721655623,4 | 508,013     | 1           |
| cg25088874 | BMPR1B   | 0,1207   | 0,246       | 0,1253        | 0,004848 | 4,52238E+11 | 3514,976    | 5           |
| cg23166362 | PIK3CD   | 0,4237   | 0,554       | 0,1303        | 0,00487  | 249,9191    | 5,3532      | 11667,6693  |
| cg06790324 | GRB10    | 0,118    | 0,2105      | 0,0924        | 0,004922 | 265511817,1 | 356,98      | 1,9748E+14  |
| cg05595345 | ARRDC4   | 0,1028   | 0,2533      | 0,1505        | 0,004958 | 1459690758  | 591,1031    | 3           |
| cg04434339 | ST6GAL2  | 0,2684   | 0,3998      | 0,1314        | 0,004995 | 3501327,278 | 94,492      | 1,29739E+11 |
| cg12594641 | MGC52057 | 0,2017   | 0,3668      | 0,1651        | 0,005003 | 55569,9207  | 27,0155     | 114305194,3 |
| cg25766046 | ROR2     | 0,2453   | 0,4443      | 0,199         | 0,005031 | 671,488     | 7,1074      | 63440,2087  |
| cg20339650 | IGF2     | 0,1422   | 0,3976      | 0,2553        | 0,005096 | 8840147,051 | 121,7898    | 6,41665E+11 |
| cg23748737 | SCARF2   | 0,2522   | 0,4021      | 0,15          | 0,005113 | 8428,3492   | 15,0514     | 4719620,694 |
| cg15439862 | DSC3     | 0,1416   | 0,3667      | 0,2251        | 0,00513  | 55784467,49 | 209,7298    | 1,48377E+13 |
| cg20616414 | WNK2     | 0,1673   | 0,3792      | 0,2119        | 0,005134 | 4816790,084 | 100,5589    | 2,30725E+11 |
| cg11993754 | ERBB2    | 0,1152   | 0,2842      | 0,1689        | 0,005142 | 72964299,58 | 226,4881    | 2,35058E+13 |
| cg02090283 | CNTNAP3  | 0,2382   | 0,3262      | 0,088         | 0,005217 | 625,6947    | 6,8277      | 57338,8319  |
| cg24396745 | HCN4     | 0,229    | 0,5953      | 0,3663        | 0,005246 | 13801,5906  | 17,1101     | 11132832,15 |
| cg11832722 | DSC3     | 0,1056   | 0,3366      | 0,231         | 0,005276 | 1           | 34382,7026  | 9           |
| cg15774153 | FGF19    | 0,1647   | 0,2769      | 0,1122        | 0,005296 | 3           | 9496731,694 | 9           |

|            |          |        |        |        |          |             |            |             |
|------------|----------|--------|--------|--------|----------|-------------|------------|-------------|
| cg05674944 | SLC30A2  | 0,1568 | 0,3539 | 0,197  | 0,005333 | 256775,3822 | 40,1958    | 1640312394  |
| cg17183991 | HS6ST3   | 0,1747 | 0,2518 | 0,0771 | 0,005345 | 450,2898    | 6,1151     | 33157,5488  |
| cg21380842 | KCNJ6    | 0,2192 | 0,3137 | 0,0945 | 0,005364 | 11081,3215  | 15,7577    | 7792739,162 |
| cg23090046 | KNS2     | 0,1    | 0,3889 | 0,2889 | 0,00542  | 1,6695E+12  | 4058,1082  | 6           |
| cg02166532 | IGF2     | 0,1286 | 0,5182 | 0,3896 | 0,005446 | 1           | 62254,127  | 5           |
| cg19177941 | ALDH1A3  | 0,1337 | 0,4505 | 0,3167 | 0,005474 | 7,04011E+14 | 23504,5407 | 2           |
| cg02111587 | TACR1    | 0,153  | 0,2953 | 0,1423 | 0,005521 | 9926,1821   | 14,9213    | 6603265,989 |
| cg18815943 | FOXE3    | 0,1542 | 0,2645 | 0,1103 | 0,005532 | 8025,4314   | 13,9982    | 4601126,88  |
| cg10694152 | SLC15A1  | 0,2252 | 0,4189 | 0,1937 | 0,005665 | 6424840,622 | 96,5773    | 4,27415E+11 |
| cg24482234 | LASS1    | 0,1681 | 0,3704 | 0,2023 | 0,005669 | 42691,8847  | 22,3731    | 81463868,53 |
| cg08797471 | DAPK1    | 0,1657 | 0,3866 | 0,2209 | 0,005808 | 36863,5     | 20,9842    | 64759094,47 |
| cg12893143 | UNC5A    | 0,299  | 0,4238 | 0,1248 | 0,005991 | 10411540,66 | 103,0216   | 1,05221E+12 |
| cg24662961 | IRX3     | 0,1375 | 0,314  | 0,1766 | 0,00602  | 446269241,5 | 300,219    | 6,6337E+14  |
| cg07845566 | B3GAT1   | 0,3306 | 0,4065 | 0,076  | 0,006056 | 403,5998    | 5,5603     | 29295,8344  |
| cg22919728 | CHST13   | 0,1113 | 0,3875 | 0,2762 | 0,006087 | 1468686,102 | 57,6216    | 37434558867 |
| cg10000775 | PDLIM3   | 0,2266 | 0,4173 | 0,1907 | 0,00615  | 701,3296    | 6,4558     | 76189,5828  |
| cg04532952 | CA4      | 0,1346 | 0,3101 | 0,1755 | 0,00625  | 9389,3968   | 13,339     | 6609264,152 |
| cg25027167 | DGAT1    | 0,1384 | 0,3803 | 0,2419 | 0,00626  | 39805,4368  | 20,0515    | 79020206,37 |
| cg25234611 | VWA1     | 0,1331 | 0,2357 | 0,1026 | 0,006279 | 6628499,92  | 84,9437    | 5,17249E+11 |
| cg22377389 | GJB6     | 0,2032 | 0,412  | 0,2088 | 0,006483 | 10458,6547  | 13,3529    | 8191735,589 |
| cg09952204 | RASGRF2  | 0,1118 | 0,1894 | 0,0775 | 0,006567 | 1110036979  | 333,2496   | 3           |
| cg04684516 | SNCAIP   | 0,1218 | 0,244  | 0,1222 | 0,006574 | 63349,4971  | 21,8178    | 183939523,6 |
| cg16632715 | HOXD11   | 0,1125 | 0,3396 | 0,2272 | 0,00668  | 2295822,668 | 58,153     | 90636744234 |
| cg15105703 | NIP      | 0,1338 | 0,2789 | 0,1451 | 0,006697 | 7390842909  | 543,818    | 1           |
| cg23922708 | PAR6G    | 0,1353 | 0,2269 | 0,0916 | 0,006749 | 403619517,2 | 239,5912   | 6,79944E+14 |
| cg14223995 | UCP1     | 0,1276 | 0,2506 | 0,1229 | 0,006781 | 66060,0763  | 21,4136    | 203792582,6 |
| cg21965997 | DRD1IP   | 0,243  | 0,345  | 0,1021 | 0,006834 | 10000,5855  | 12,6344    | 7915808,461 |
| cg21481775 | NKX3-1   | 0,1524 | 0,2929 | 0,1405 | 0,006956 | 13924,8253  | 13,6335    | 14222395,99 |
| cg02515725 | PDLIM3   | 0,1448 | 0,3161 | 0,1713 | 0,007053 | 1942,8724   | 7,8756     | 479297,1474 |
| cg22368262 | C10orf35 | 0,1529 | 0,302  | 0,1491 | 0,007056 | 315253,6536 | 31,5148    | 3153596225  |
| cg27049761 | B3GNT4   | 0,3723 | 0,4667 | 0,0945 | 0,007072 | 244,6864    | 4,4716     | 13389,2339  |
| cg12515638 | SFRP4    | 0,2355 | 0,3425 | 0,107  | 0,007199 | 858,42      | 6,2256     | 118364,2191 |
| cg27626299 | EVX1     | 0,101  | 0,2301 | 0,1291 | 0,007316 | 1           | 76805,5099 | 2           |
| cg08853659 | CLSTN2   | 0,4912 | 0,5981 | 0,107  | 0,007329 | 88,7052     | 3,3431     | 2353,6779   |
| cg21321735 | KIF1A    | 0,2765 | 0,3577 | 0,0811 | 0,007336 | 260,0461    | 4,4631     | 15151,8213  |
| cg12373771 | CECR6    | 0,2128 | 0,4063 | 0,1936 | 0,00741  | 182804,5737 | 25,7414    | 1298198603  |
| cg08186362 | HRH3     | 0,1994 | 0,2854 | 0,086  | 0,007476 | 257598,4988 | 27,9347    | 2375434662  |
| cg24417499 | HPCA     | 0,1075 | 0,3236 | 0,2161 | 0,007505 | 164038,4519 | 24,6547    | 1091418654  |
| cg24727182 | AGXT2L1  | 0,1627 | 0,2363 | 0,0736 | 0,007515 | 5177,3257   | 9,7921     | 2737371,905 |
| cg16557944 | GPX7     | 0,3683 | 0,4371 | 0,0688 | 0,007625 | 68,9498     | 3,0764     | 1545,3526   |
| cg15887846 | CST6     | 0,1011 | 0,4455 | 0,3445 | 0,007689 | 347167,8878 | 29,2716    | 4117485661  |
| cg08914623 | ALX4     | 0,2553 | 0,3422 | 0,0868 | 0,007799 | 900,5793    | 5,9991     | 135194,9467 |
| cg05621401 | RET      | 0,2602 | 0,4212 | 0,1611 | 0,007903 | 1163,9914   | 6,3625     | 212946,6229 |
| cg07452799 | PAR3     | 0,1022 | 0,1893 | 0,0871 | 0,007942 | 92321497,79 | 121,3827   | 7,02181E+13 |
| cg06263495 | ASCL2    | 0,1047 | 0,2757 | 0,171  | 0,0081   | 3851289,298 | 51,3987    | 2,88576E+11 |
| cg00775197 | MGC33600 | 0,1209 | 0,2689 | 0,148  | 0,008178 | 257030,1514 | 25,1545    | 2626350547  |
| cg24680602 | ZNF232   | 0,2012 | 0,3539 | 0,1527 | 0,008292 | 1611,0507   | 6,6998     | 387397,1322 |
| cg05260966 | TIMP3    | 0,1476 | 0,4069 | 0,2593 | 0,008409 | 75930,1128  | 17,804     | 323824249   |
| cg15898840 | IGFBP3   | 0,3529 | 0,6651 | 0,3122 | 0,008511 | 1196,9882   | 6,0976     | 234973,132  |
| cg00290506 | CNIH3    | 0,318  | 0,4609 | 0,1429 | 0,008541 | 185,1547    | 3,7813     | 9066,3685   |
| cg00351011 | LASS4    | 0,2807 | 0,3811 | 0,1004 | 0,008576 | 206,7083    | 3,8805     | 11011,0125  |
| cg22750254 | CCDC3    | 0,2157 | 0,3529 | 0,1373 | 0,008586 | 5877,0929   | 9,0828     | 3802802,387 |
| cg12220493 | TITF1    | 0,1025 | 0,2214 | 0,119  | 0,008595 | 276320,3614 | 24,1443    | 3162364088  |
| cg22571530 | NFASC    | 0,1335 | 0,2765 | 0,143  | 0,008632 | 56182,9734  | 16,0351    | 196850846,8 |
| cg15057581 | PTPNS1   | 0,2029 | 0,3259 | 0,123  | 0,008731 | 1342,6576   | 6,1684     | 292253,075  |
| cg05270634 | RND2     | 0,2515 | 0,5015 | 0,2501 | 0,008736 | 2217,4785   | 6,9986     | 702595,1794 |
| cg22772878 | DIRAS1   | 0,1296 | 0,4836 | 0,354  | 0,00877  | 20638,6794  | 12,2477    | 34778285,99 |
| cg22396755 | RAP1GA1  | 0,1146 | 0,2651 | 0,1505 | 0,008936 | 22748,6065  | 12,3245    | 41989612,31 |
| cg12770741 | NXN      | 0,1242 | 0,6486 | 0,5243 | 0,008963 | 11302,2812  | 10,3154    | 12383544,2  |
| cg01352108 | KCNK4    | 0,1197 | 0,4963 | 0,3766 | 0,009077 | 129584,2056 | 18,7091    | 897534233,4 |

|            |            |        |        |        |          |             |         |             |
|------------|------------|--------|--------|--------|----------|-------------|---------|-------------|
| cg07380496 | MAP1B      | 0,3075 | 0,4054 | 0,0979 | 0,009094 | 120,8457    | 3,2938  | 4433,7555   |
| cg07109287 | LHX2       | 0,2578 | 0,4826 | 0,2248 | 0,009188 | 201,4097    | 3,7196  | 10905,8322  |
| cg23397015 | INHBB      | 0,1106 | 0,3177 | 0,207  | 0,009272 | 704047,13   | 27,7095 | 17888504830 |
| cg02409351 | CART1      | 0,2651 | 0,395  | 0,1299 | 0,009355 | 485,9561    | 4,5754  | 51613,6908  |
| cg15447479 | SMO        | 0,333  | 0,4297 | 0,0966 | 0,009369 | 201,9643    | 3,6842  | 11071,3927  |
| cg24881834 | ME1        | 0,1024 | 0,3295 | 0,2271 | 0,009529 | 4051198,827 | 40,937  | 4,00914E+11 |
| cg26195812 | DPYSL5     | 0,3813 | 0,6418 | 0,2605 | 0,009531 | 201,6106    | 3,6491  | 11138,7593  |
| cg00234616 | TLX2       | 0,1257 | 0,3297 | 0,2041 | 0,009558 | 711587,25   | 26,6691 | 18986659698 |
| cg03048535 | FOXN4      | 0,1337 | 0,2118 | 0,0781 | 0,009623 | 8898653,521 | 48,819  | 1,62203E+12 |
| cg26363196 | ST6GALNAC3 | 0,1256 | 0,2602 | 0,1346 | 0,009676 | 8925,0744   | 9,0737  | 8778924,405 |
| cg10193817 | IGSF4      | 0,1441 | 0,3031 | 0,1589 | 0,009734 | 13944719,01 | 53,426  | 3,63971E+12 |
| cg00625653 | WNT7A      | 0,368  | 0,5527 | 0,1847 | 0,009751 | 108,8233    | 3,1059  | 3812,9628   |
| cg11115702 | SPIN1      | 0,1317 | 0,2651 | 0,1334 | 0,009772 | 21404515,52 | 58,8657 | 7,78303E+12 |
| cg19781133 | KCNH2      | 0,1328 | 0,25   | 0,1172 | 0,010002 | 12356,8147  | 9,5119  | 16052634,95 |
| cg08315770 | KCNK17     | 0,2213 | 0,3908 | 0,1695 | 0,010007 | 195,2942    | 3,528   | 10810,6536  |
| cg06637774 | P2RY6      | 0,1167 | 0,4292 | 0,3125 | 0,010038 | 108777,4141 | 15,932  | 742689506,1 |
| cg23422659 | WNT9B      | 0,1564 | 0,3084 | 0,152  | 0,010269 | 1885,3133   | 5,9457  | 597815,5879 |
| cg04796162 | IGFBP3     | 0,2612 | 0,4573 | 0,1961 | 0,010377 | 163,8095    | 3,3191  | 8084,663    |
| cg01805540 | CACNB2     | 0,1145 | 0,2251 | 0,1107 | 0,010481 | 70487,0258  | 13,6678 | 363511813,6 |
| cg01899253 | FLT1       | 0,1109 | 0,3985 | 0,2877 | 0,010735 | 98165,9878  | 14,3506 | 671507055,6 |
| cg21303386 | RGS7       | 0,1528 | 0,2931 | 0,1402 | 0,010915 | 4951,5236   | 7,0761  | 3464835,454 |
| cg16352283 | FAM46B     | 0,1925 | 0,5464 | 0,354  | 0,011082 | 1850,9452   | 5,5751  | 614513,5432 |
| cg21530890 | SOX8       | 0,3316 | 0,4424 | 0,1109 | 0,011123 | 200,6538    | 3,3493  | 12020,9541  |
| cg14706178 | FLJ32786   | 0,1563 | 0,219  | 0,0627 | 0,011199 | 1599,6349   | 5,3479  | 478475,4938 |
| cg09254939 | KLK10      | 0,139  | 0,2643 | 0,1253 | 0,011428 | 25690,8815  | 9,8326  | 67125614,95 |
| cg08261094 | SFRP4      | 0,2561 | 0,4963 | 0,2401 | 0,011572 | 193,9454    | 3,25    | 11573,6225  |
| cg10644361 | MIPOL1     | 0,1229 | 0,2716 | 0,1486 | 0,011594 | 5439,8699   | 6,8406  | 4325939,08  |
| cg18275051 | CYB5R1     | 0,1557 | 0,3167 | 0,161  | 0,011629 | 1664,268    | 5,2368  | 528911,4504 |
| cg20256494 | CABP7      | 0,3103 | 0,4829 | 0,1726 | 0,011647 | 135,8982    | 2,9911  | 6174,422    |
| cg14662379 | KIF1A      | 0,3508 | 0,5768 | 0,226  | 0,011737 | 255,1346    | 3,4264  | 18997,7926  |
| cg24317255 | RGS17      | 0,1511 | 0,2483 | 0,0972 | 0,011882 | 1577,1014   | 5,0858  | 489061,8901 |
| cg04686412 | PSD2       | 0,1063 | 0,3045 | 0,1982 | 0,012028 | 5350,4598   | 6,5851  | 4347284,457 |
| cg23854009 | ZNF530     | 0,1534 | 0,2856 | 0,1322 | 0,012217 | 3318,6974   | 5,8478  | 1883407,842 |
| cg21296230 | GREM1      | 0,1134 | 0,3269 | 0,2135 | 0,012241 | 3688,7036   | 5,9733  | 2277875,072 |
| cg17252960 | ID4        | 0,1288 | 0,3439 | 0,215  | 0,012297 | 681,7844    | 4,123   | 112741,5944 |
| cg16731240 | ZNF577     | 0,3287 | 0,6465 | 0,3178 | 0,012549 | 167,124     | 3,0036  | 9299,0065   |
| cg14603345 | BTBD3      | 0,1213 | 0,4609 | 0,3396 | 0,012579 | 16797,2579  | 8,0668  | 34976227,88 |
| cg17740399 | IPF1       | 0,11   | 0,2047 | 0,0947 | 0,012617 | 7662150,872 | 29,8558 | 1,9664E+12  |
| cg02001410 | MAP1B      | 0,233  | 0,3415 | 0,1086 | 0,012897 | 158,0913    | 2,9221  | 8552,9637   |
| cg03251079 | HMGA2      | 0,1065 | 0,2433 | 0,1367 | 0,01298  | 866271,6049 | 17,9164 | 41884978155 |
| cg02016419 | TEKT3      | 0,1161 | 0,4703 | 0,3542 | 0,013058 | 156789,9409 | 12,3884 | 1984356162  |
| cg04993257 | PLAC2      | 0,117  | 0,4983 | 0,3813 | 0,01327  | 36325,5635  | 8,9343  | 147694149,1 |
| cg18342279 | ZAR1       | 0,1069 | 0,1923 | 0,0854 | 0,013288 | 173126,6632 | 12,3507 | 2426818132  |
| cg15843823 | ALOX15     | 0,1216 | 0,3245 | 0,2029 | 0,013327 | 1137,9396   | 4,3238  | 299485,4416 |
| cg11648289 | EN2        | 0,1158 | 0,2092 | 0,0934 | 0,013378 | 6775,3038   | 6,2432  | 7352739,796 |
| cg02503850 | ADAMTS14   | 0,3401 | 0,6196 | 0,2795 | 0,01346  | 431,6108    | 3,5098  | 53077,2106  |
| cg21309147 | STAC2      | 0,446  | 0,5766 | 0,1306 | 0,013537 | 88,0866     | 2,5187  | 3080,6251   |
| cg21905630 | GSH2       | 0,1081 | 0,2549 | 0,1468 | 0,01366  | 20562,265   | 7,6769  | 55075184,98 |
| cg12420104 | DMRT3      | 0,2365 | 0,4542 | 0,2177 | 0,013734 | 76,8796     | 2,4314  | 2430,92     |
| cg18501026 | DOCK3      | 0,1456 | 0,4697 | 0,324  | 0,013995 | 345,5298    | 3,2648  | 36569,6466  |
| cg20239740 | SYT5       | 0,2527 | 0,3837 | 0,131  | 0,014006 | 375,0778    | 3,3176  | 42404,9115  |
| cg02788102 | IGSF4      | 0,2328 | 0,3825 | 0,1497 | 0,014054 | 2553,8466   | 4,8753  | 1337785,92  |
| cg19224837 | GSC        | 0,1579 | 0,254  | 0,0961 | 0,014351 | 1699,7962   | 4,4095  | 655238,672  |
| cg14046986 | RCSD1      | 0,1204 | 0,1944 | 0,074  | 0,014658 | 273,0597    | 3,0191  | 24697,045   |
| cg12388309 | PAK7       | 0,2689 | 0,5986 | 0,3297 | 0,014864 | 152,013     | 2,6677  | 8662,0939   |
| cg18952560 | PTPNS1     | 0,1747 | 0,2961 | 0,1214 | 0,014882 | 339,01      | 3,1176  | 36864,3711  |
| cg10978355 | CKMT2      | 0,1111 | 0,3882 | 0,2771 | 0,014918 | 480,8893    | 3,3318  | 69409,1066  |
| cg26780404 | COL12A1    | 0,1019 | 0,1984 | 0,0966 | 0,015076 | 925302,7174 | 14,2931 | 59901820285 |
| cg21351994 | EMX1       | 0,1254 | 0,1978 | 0,0723 | 0,015252 | 9639,6781   | 5,8317  | 15934091,88 |
| cg02672220 | SIM2       | 0,1006 | 0,2952 | 0,1947 | 0,015259 | 3024302844  | 66,3351 | 1           |

|            |           |        |        |        |          |             |            |             |
|------------|-----------|--------|--------|--------|----------|-------------|------------|-------------|
| cg18959478 | PRKCDBP   | 0,1164 | 0,2311 | 0,1147 | 0,015408 | 2           | 11926,3426 | 4           |
| cg23472215 | GSTM3     | 0,3362 | 0,4584 | 0,1222 | 0,015636 | 55,2835     | 2,1364     | 1430,5588   |
| cg18489434 | VASH1     | 0,1702 | 0,2293 | 0,0591 | 0,015707 | 1045,4704   | 3,7116     | 294488,1424 |
| cg08185241 | GOS2      | 0,1558 | 0,3819 | 0,2261 | 0,015815 | 408,7761    | 3,0934     | 54018,0784  |
| cg04528819 | KLF14     | 0,111  | 0,286  | 0,175  | 0,015995 | 1203,0268   | 3,7514     | 385796,116  |
| cg18403396 | B3GAT2    | 0,1662 | 0,298  | 0,1318 | 0,016131 | 1447,4314   | 3,8536     | 543657,5743 |
| cg12998491 | FAM78A    | 0,4509 | 0,5064 | 0,0554 | 0,016589 | 860863,1756 | 12,0073    | 61719373513 |
| cg02244695 | HCA112    | 0,1006 | 0,2407 | 0,1401 | 0,016662 | 15068699,43 | 20,0263    | 1,13384E+13 |
| cg08211091 | FLJ37478  | 0,1632 | 0,4194 | 0,2562 | 0,016687 | 255,5706    | 2,7296     | 23928,8031  |
| cg26646370 | SHD       | 0,2561 | 0,4303 | 0,1742 | 0,017036 | 68,265      | 2,1255     | 2192,4779   |
| cg03663215 | ADCY2     | 0,1059 | 0,2366 | 0,1307 | 0,017146 | 10811,9261  | 5,2106     | 22434650,28 |
| cg12439899 | TFAP2A    | 0,2736 | 0,4868 | 0,2131 | 0,017412 | 166,2656    | 2,4565     | 11253,317   |
| cg13344740 | DLX5      | 0,1433 | 0,5752 | 0,4319 | 0,017678 | 1986,3822   | 3,7431     | 1054130,151 |
| cg06552037 | INHA      | 0,3988 | 0,5193 | 0,1205 | 0,018471 | 76,6737     | 2,0741     | 2834,4375   |
| cg02536286 | TFAP2C    | 0,4686 | 0,5866 | 0,118  | 0,018525 | 23,7844     | 1,7015     | 332,4604    |
| cg14116122 | CART1     | 0,1873 | 0,2812 | 0,0939 | 0,018578 | 359,321     | 2,6771     | 48228,6062  |
| cg02154186 | PNMA2     | 0,1836 | 0,4315 | 0,248  | 0,018839 | 1850,4131   | 3,4736     | 985732,8389 |
| cg21918500 | ZNF124    | 0,1928 | 0,3736 | 0,1809 | 0,019013 | 2095,2522   | 3,5128     | 1249738,148 |
| cg13694867 | SIM2      | 0,1109 | 0,2087 | 0,0977 | 0,019164 | 4301,6622   | 3,9188     | 4721870,394 |
| cg13230197 | CSPG4     | 0,148  | 0,4189 | 0,2709 | 0,019327 | 14663,3613  | 4,7358     | 45402189,91 |
| cg19283196 | SLC10A4   | 0,1604 | 0,3442 | 0,1839 | 0,019423 | 585,464     | 2,7977     | 122518,8275 |
| cg07850604 | INSM2     | 0,1113 | 0,2099 | 0,0986 | 0,019979 | 1916,3099   | 3,2918     | 1115565,777 |
| cg22231902 | EN1       | 0,3476 | 0,5194 | 0,1718 | 0,020268 | 69,8624     | 1,9369     | 2519,8666   |
| cg24719601 | PHOX2B    | 0,1246 | 0,3337 | 0,2091 | 0,020884 | 27132,5041  | 4,6983     | 156690805,1 |
| cg03160135 | VGLL2     | 0,1399 | 0,3572 | 0,2173 | 0,021198 | 453,4422    | 2,4952     | 82401,4848  |
| cg25242557 | PAX6      | 0,1757 | 0,4691 | 0,2935 | 0,021361 | 1628,5432   | 2,9969     | 884971,4713 |
| cg15536490 | TFAP2C    | 0,2222 | 0,389  | 0,1668 | 0,021602 | 102,1266    | 1,9725     | 5287,5977   |
| cg04451770 | ENTPD1    | 0,1184 | 0,4382 | 0,3198 | 0,021631 | 24206,2067  | 4,3945     | 133336023,1 |
| cg17788682 | ARNT2     | 0,1432 | 0,2235 | 0,0803 | 0,021774 | 919165,9892 | 7,396      | 1,14233E+11 |
| cg01557297 | SLC22A17  | 0,1973 | 0,2705 | 0,0732 | 0,021795 | 92,3998     | 1,9327     | 4417,4518   |
| cg19378133 | A2BP1     | 0,2415 | 0,4404 | 0,1989 | 0,021957 | 731,3547    | 2,594      | 206196,519  |
| cg00024396 | ELOVL5    | 0,1799 | 0,3249 | 0,1451 | 0,0226   | 555,8618    | 2,429      | 127203,1331 |
| cg26372517 | TFAP2E    | 0,1256 | 0,4354 | 0,3098 | 0,022882 | 5016,2862   | 3,2582     | 7723045,69  |
| cg02927346 | RASL10B   | 0,1798 | 0,4947 | 0,3149 | 0,023318 | 971,6899    | 2,5467     | 370750,8109 |
| cg08820801 | FBXO17    | 0,1247 | 0,6638 | 0,5391 | 0,023427 | 1369,4552   | 2,6551     | 706330,9685 |
| cg19995014 | APLP1     | 0,2023 | 0,3238 | 0,1215 | 0,023446 | 903,1112    | 2,5077     | 325238,7194 |
| cg20881054 | VASH1     | 0,1255 | 0,2043 | 0,0788 | 0,023517 | 380,9121    | 2,2259     | 65184,2317  |
| cg17907567 | HAMP      | 0,1229 | 0,4285 | 0,3057 | 0,023636 | 2788,5151   | 2,8931     | 2687755,44  |
| cg09874752 | SFRP5     | 0,414  | 0,5144 | 0,1004 | 0,023699 | 44,7502     | 1,6612     | 1205,528    |
| cg03586879 | A2BP1     | 0,1763 | 0,2912 | 0,1149 | 0,023868 | 3837,9935   | 2,9839     | 4936625,127 |
| cg15242570 | CTSL      | 0,1352 | 0,2888 | 0,1536 | 0,023977 | 300,5888    | 2,1213     | 42594,2158  |
| cg15700739 | HOXC5     | 0,1069 | 0,36   | 0,2531 | 0,024081 | 496,9921    | 2,2576     | 109410,6587 |
| cg14920846 | NAV1      | 0,1097 | 0,5758 | 0,4662 | 0,024159 | 34059,7236  | 3,9108     | 296631475,2 |
| cg11530960 | DMRT2     | 0,2634 | 0,4073 | 0,144  | 0,024346 | 139,1797    | 1,8953     | 10220,6994  |
| cg14155416 | L3MBTL4   | 0,25   | 0,4152 | 0,1652 | 0,024501 | 111,3077    | 1,833      | 6759,2368   |
| cg07098866 | MEGF11    | 0,1766 | 0,2704 | 0,0939 | 0,024586 | 9383,6397   | 3,2267     | 27289133,87 |
| cg19210770 | ACCN4     | 0,2249 | 0,3908 | 0,166  | 0,025096 | 89,7327     | 1,7543     | 4589,963    |
| cg16539629 | C14orf132 | 0,1979 | 0,3398 | 0,1419 | 0,025831 | 87,2297     | 1,7141     | 4439,0143   |
| cg18793806 | ZNF514    | 0,1586 | 0,4871 | 0,3285 | 0,025982 | 5676,2941   | 2,8143     | 11448712,75 |
| cg10247252 | GALR2     | 0,1892 | 0,3963 | 0,2071 | 0,026071 | 199,831     | 1,8801     | 21239,0918  |
| cg14795968 | ACADL     | 0,1652 | 0,3349 | 0,1697 | 0,026132 | 259,6794    | 1,9359     | 34833,3395  |
| cg00121640 | ASTN2     | 0,1434 | 0,3217 | 0,1782 | 0,026139 | 634,5492    | 2,1522     | 187092,8571 |
| cg01920829 | CDK5R2    | 0,2051 | 0,5254 | 0,3202 | 0,026836 | 234,8878    | 1,8704     | 29497,8921  |
| cg19332710 | RIMS4     | 0,4865 | 0,6112 | 0,1246 | 0,026852 | 32,9133     | 1,4925     | 725,8373    |
| cg18678121 | SEC61A2   | 0,1393 | 0,8164 | 0,6772 | 0,026894 | 1050,9537   | 2,2159     | 498446,643  |
| cg19237753 | PTPNS1    | 0,1217 | 0,2292 | 0,1075 | 0,0273   | 1665,5531   | 2,2954     | 1208517,551 |
| cg00565688 | TP73      | 0,2746 | 0,5531 | 0,2784 | 0,027522 | 126,3961    | 1,709      | 9348,2021   |
| cg03682712 | LOXL1     | 0,1105 | 0,3628 | 0,2523 | 0,027579 | 6214,75     | 2,6232     | 14723827,85 |
| cg13643796 | ADAMTS3   | 0,1386 | 0,2598 | 0,1212 | 0,027704 | 162,3921    | 1,7478     | 15088,146   |
| cg07766612 | SLC30A2   | 0,2706 | 0,4209 | 0,1503 | 0,027743 | 114,587     | 1,6804     | 7813,5581   |

|            |              |        |        |        |          |           |        |             |
|------------|--------------|--------|--------|--------|----------|-----------|--------|-------------|
| cg12078929 | SERHL        | 0,1169 | 0,2453 | 0,1284 | 0,027788 | 375,9226  | 1,9109 | 73954,119   |
| cg01322134 | WNT3A        | 0,329  | 0,5869 | 0,2579 | 0,027799 | 48,4481   | 1,5274 | 1536,7426   |
| cg12739034 | PTGER3       | 0,1092 | 0,2121 | 0,1029 | 0,02781  | 194,0243  | 1,7766 | 21190,1928  |
| cg22469841 | FSTL1        | 0,1735 | 0,2446 | 0,0712 | 0,027848 | 142,6213  | 1,7161 | 11853,2281  |
| cg15640375 | PRG2         | 0,2956 | 0,594  | 0,2984 | 0,028242 | 99,7048   | 1,6335 | 6085,6439   |
| cg12507125 | WWTR1        | 0,1513 | 0,2709 | 0,1196 | 0,028736 | 70,9284   | 1,5567 | 3231,7414   |
| cg04478795 | SMO          | 0,1188 | 0,3118 | 0,1931 | 0,028953 | 730,8666  | 1,9675 | 271493,6874 |
| cg04969808 | WNT7A        | 0,2963 | 0,4591 | 0,1629 | 0,029038 | 58,3377   | 1,515  | 2246,4157   |
| cg11897314 | LOC51334     | 0,333  | 0,4966 | 0,1637 | 0,029148 | 42,673    | 1,464  | 1243,8585   |
| cg09276363 | KCND3        | 0,1406 | 0,5361 | 0,3956 | 0,029769 | 1405,3601 | 2,0361 | 970023,9988 |
| cg02440177 | ZNF702       | 0,2386 | 0,3881 | 0,1496 | 0,030162 | 51,4326   | 1,4594 | 1812,6064   |
| cg05636175 | TNFRSF10C    | 0,3153 | 0,5962 | 0,281  | 0,03031  | 67,0222   | 1,4918 | 3011,0344   |
| cg22757447 | IMPACT       | 0,1185 | 0,324  | 0,2055 | 0,030451 | 165,9741  | 1,6199 | 17005,7262  |
| cg25738273 | DUSP26       | 0,3557 | 0,4659 | 0,1102 | 0,03053  | 55,9812   | 1,4595 | 2147,282    |
| cg07935568 | MLNR         | 0,3044 | 0,5306 | 0,2262 | 0,03057  | 63,4418   | 1,4754 | 2728,0436   |
| cg25760229 | CACNA1H      | 0,1732 | 0,2976 | 0,1244 | 0,030692 | 374,8167  | 1,7357 | 80938,687   |
| cg00892798 | NGFR         | 0,2863 | 0,4071 | 0,1208 | 0,030778 | 47,494    | 1,4296 | 1577,8158   |
| cg04970352 | ALX4         | 0,2274 | 0,3603 | 0,1329 | 0,031783 | 51,3014   | 1,4095 | 1867,1633   |
| cg00576250 | ZNF663       | 0,1528 | 0,3039 | 0,1511 | 0,032456 | 1310,4814 | 1,8222 | 942470,1631 |
| cg03664800 | LOXL2        | 0,254  | 0,3791 | 0,1251 | 0,032716 | 61,7042   | 1,4035 | 2712,8858   |
| cg09660171 | LMX1B        | 0,1949 | 0,3784 | 0,1835 | 0,032824 | 196,2532  | 1,5389 | 25027,7488  |
| cg11612345 | SMOC2        | 0,1025 | 0,3343 | 0,2318 | 0,032965 | 385,6243  | 1,619  | 91849,5438  |
| cg09595479 | PRPH         | 0,1379 | 0,4398 | 0,3019 | 0,033218 | 77,395    | 1,4136 | 4237,4576   |
| cg19616230 | SLC34A2      | 0,1959 | 0,3227 | 0,1268 | 0,033254 | 51,9837   | 1,3685 | 1974,7044   |
| cg03464655 | FLJ39822     | 0,129  | 0,4387 | 0,3097 | 0,033594 | 675,2424  | 1,6582 | 274971,3711 |
| cg02498063 | CCDC60       | 0,1298 | 0,5323 | 0,4025 | 0,034428 | 3729,7109 | 1,8275 | 7611877,634 |
| cg17226343 | DIRAS1       | 0,1015 | 0,2716 | 0,1702 | 0,035805 | 2969,8738 | 1,6992 | 5190800,217 |
| cg09542745 | SFRP5        | 0,1152 | 0,2518 | 0,1367 | 0,036178 | 81,4762   | 1,3277 | 4999,7946   |
| cg09009111 | EMILIN2      | 0,3728 | 0,474  | 0,1012 | 0,036389 | 29,4861   | 1,2391 | 701,6431    |
| cg14312526 | FOXL2        | 0,2858 | 0,4673 | 0,1815 | 0,036412 | 61,4415   | 1,2975 | 2909,409    |
| cg09721427 | HHEX         | 0,1443 | 0,387  | 0,2426 | 0,036521 | 220,6466  | 1,4026 | 34709,2806  |
| cg14913925 | DKFZp727G131 | 0,1813 | 0,3752 | 0,194  | 0,036645 | 164,6286  | 1,3728 | 19742,6246  |
| cg16786703 | ADAM8        | 0,2185 | 0,3126 | 0,0941 | 0,03665  | 66,4166   | 1,2974 | 3399,9295   |
| cg01718139 | UNQ3033      | 0,1291 | 0,7512 | 0,622  | 0,037058 | 5539,9212 | 1,6777 | 18293792,8  |
| cg17558126 | RASSF5       | 0,1216 | 0,3534 | 0,2319 | 0,037361 | 185,5621  | 1,3576 | 25364,2132  |
| cg00557354 | ARRGEF7      | 0,4404 | 0,6452 | 0,2048 | 0,037513 | 27,656    | 1,2114 | 631,3715    |
| cg13916742 | SCGB1D1      | 0,1034 | 0,7591 | 0,6557 | 0,038145 | 3495,0937 | 1,562  | 7820510,658 |
| cg25549459 | POU3F3       | 0,158  | 0,3061 | 0,1481 | 0,038249 | 267,2248  | 1,3534 | 52763,7495  |
| cg20895028 | CDH26        | 0,1376 | 0,703  | 0,5654 | 0,038352 | 849,5783  | 1,436  | 502647,0302 |
| cg11319389 | C2orf100     | 0,1053 | 0,451  | 0,3457 | 0,038426 | 278,1114  | 1,3497 | 57305,1356  |
| cg16175263 | TNFRSF10C    | 0,2566 | 0,6463 | 0,3898 | 0,038813 | 102,1148  | 1,2684 | 8220,783    |
| cg09306675 | EYA2         | 0,1949 | 0,4437 | 0,2488 | 0,039319 | 84,4954   | 1,2425 | 5745,9279   |
| cg14883392 | ASCL1        | 0,254  | 0,4168 | 0,1628 | 0,039824 | 245,6332  | 1,2917 | 46709,065   |
| cg22309489 | OKL38        | 0,1359 | 0,8281 | 0,6923 | 0,040122 | 1117,5059 | 1,3722 | 910079,8565 |
| cg09945801 | WRN          | 0,1544 | 0,6584 | 0,5039 | 0,04114  | 303,0788  | 1,2584 | 72993,7368  |
| cg18123948 | GATA4        | 0,106  | 0,2738 | 0,1678 | 0,041681 | 85,1233   | 1,1822 | 6129,0096   |
| cg09949775 | COMP         | 0,3086 | 0,6216 | 0,3131 | 0,041739 | 40,2969   | 1,1482 | 1414,1953   |
| cg10071275 | MYT1         | 0,1526 | 0,7107 | 0,5581 | 0,042185 | 478,6407  | 1,2434 | 184251,0423 |
| cg26466858 | LCE3A        | 0,1017 | 0,5238 | 0,4221 | 0,043295 | 2268,4921 | 1,2621 | 4077235,244 |
| cg11847808 | EPHA8        | 0,1216 | 0,4432 | 0,3215 | 0,043505 | 242,7398  | 1,1737 | 50203,9494  |
| cg11102782 | ISYNA1       | 0,1084 | 0,3385 | 0,2301 | 0,044452 | 116,1     | 1,1251 | 11980,2085  |
| cg09462826 | FADS1        | 0,1056 | 0,2969 | 0,1913 | 0,045115 | 1843,2617 | 1,1778 | 2884640,289 |
| cg03876618 | IGFBP7       | 0,1119 | 0,5243 | 0,4123 | 0,045289 | 142,2409  | 1,1096 | 18233,983   |
| cg16954341 | SCGN         | 0,209  | 0,4427 | 0,2337 | 0,045468 | 124,6317  | 1,1022 | 14092,9977  |
| cg02780295 | PCDHGC3      | 0,3671 | 0,4967 | 0,1296 | 0,045531 | 46,9832   | 1,0795 | 2044,7938   |
| cg15901783 | KCTD12       | 0,1389 | 0,5766 | 0,4377 | 0,046113 | 267,8732  | 1,1012 | 65161,0999  |
| cg15835825 | HTR5A        | 0,1801 | 0,3181 | 0,138  | 0,046348 | 173,5834  | 1,087  | 27718,4376  |
| cg13936125 | GNAO1        | 0,2468 | 0,3475 | 0,1007 | 0,046562 | 57,282    | 1,0636 | 3085,1244   |
| cg25151295 | RANBP5       | 0,1142 | 0,8162 | 0,702  | 0,047163 | 1613,4934 | 1,097  | 2373207,662 |
| cg11465971 | GSH2         | 0,3026 | 0,4333 | 0,1307 | 0,047296 | 48,4661   | 1,0474 | 2242,6485   |

|            |           |        |        |        |          |           |        |             |
|------------|-----------|--------|--------|--------|----------|-----------|--------|-------------|
| cg25422943 | PCDH9     | 0,4564 | 0,6115 | 0,1551 | 0,047309 | 30,8641   | 1,0416 | 914,5643    |
| cg20066612 | KCNJ9     | 0,1132 | 0,4164 | 0,3032 | 0,048428 | 385,5699  | 1,042  | 142675,7454 |
| cg00176210 | ANK1      | 0,1063 | 0,6375 | 0,5313 | 0,048579 | 2519,1235 | 1,0501 | 6043313,891 |
| cg13216057 | DKK3      | 0,2135 | 0,3684 | 0,1548 | 0,048638 | 55,0712   | 1,0242 | 2961,0417   |
| cg27090216 | TNFRSF10C | 0,3483 | 0,5519 | 0,2035 | 0,048719 | 30,0173   | 1,0193 | 883,9819    |
| cg00347904 | SCUBE3    | 0,1581 | 0,6281 | 0,4699 | 0,049191 | 131,9908  | 1,0174 | 17122,8539  |
| cg26450866 | KCNA7     | 0,1585 | 0,3212 | 0,1627 | 0,049354 | 201,9234  | 1,0151 | 40165,7296  |
| cg24454143 | FLT3      | 0,1186 | 0,4467 | 0,3281 | 0,04976  | 180,2224  | 1,0055 | 32303,5328  |
| cg24794531 | TRPC1     | 0,1324 | 0,239  | 0,1066 | 0,049823 | 156,9391  | 1,0039 | 24533,6004  |
