# Supplementary material for: Multiple Sporadic Colorectal Cancers Display a Unique Methylation Phenotype
Source: PubMed Central journal article supplement (PMC3958343; doi:10.1371/journal.pone.0091033), 2014-03-18
Supplement: pone.0091033.s006.pdf [file pone.0091033.s006.pdf]

| Category        | Term                                                                                                    | Count | Pvalue      | Genes                                                                                                                                                                                                                                                                     |
|-----------------|---------------------------------------------------------------------------------------------------------|-------|-------------|---------------------------------------------------------------------------------------------------------------------------------------------------------------------------------------------------------------------------------------------------------------------------|
| GOTERM_BP_FAT   | GO:0030182~neuron differentiation                                                                       | 14    | 1,54103E-07 | RET, TUBB2B, GDF7, ERBB2, MAP1B, DPYSL5, SOX5, CXCL12, GLI3, SMO, UNC5A, DLX5, GBX2, RUNX3                                                                                                                                                                                |
| GOTERM_BP_FAT   | GO:0048812~neuron projection morphogenesis                                                              | 10    | 8,54455E-07 | SMO, GDF7, UNC5A, ERBB2, DLX5, MAP1B, GBX2, DPYSL5, CXCL12, RUNX3                                                                                                                                                                                                         |
| GOTERM_BP_FAT   | GO:0001667~ameboid cell migration                                                                       | 6     | 9,15386E-07 | FGF19, SMO, RET, GBX2, KITLG, CXCL12                                                                                                                                                                                                                                      |
| GOTERM_BP_FAT   | GO:0048858~cell projection morphogenesis                                                                | 10    | 2,72563E-06 | SMO, GDF7, UNC5A, ERBB2, DLX5, MAP1B, GBX2, DPYSL5, CXCL12, RUNX3                                                                                                                                                                                                         |
| GOTERM_BP_FAT   | GO:0032990~cell part morphogenesis                                                                      | 10    | 3,90539E-06 | SMO, GDF7, UNC5A, ERBB2, DLX5, MAP1B, GBX2, DPYSL5, CXCL12, RUNX3                                                                                                                                                                                                         |
| GOTERM_BP_FAT   | GO:0031175~neuron projection development                                                                | 10    | 3,90539E-06 | SMO, GDF7, UNC5A, ERBB2, DLX5, MAP1B, GBX2, DPYSL5, CXCL12, RUNX3                                                                                                                                                                                                         |
| GOTERM_BP_FAT   | GO:0007409~axonogenesis                                                                                 | 9     | 4,20155E-06 | GDF7, UNC5A, ERBB2, DLX5, MAP1B, GBX2, DPYSL5, CXCL12, RUNX3                                                                                                                                                                                                              |
| GOTERM_BP_FAT   | GO:0001755~neural crest cell migration                                                                  | 5     | 4,26708E-06 | FGF19, SMO, RET, GBX2, KITLG                                                                                                                                                                                                                                              |
| GOTERM_BP_FAT   | GO:0048666~neuron development                                                                           | 11    | 5,18832E-06 | SMO, RET, GDF7, UNC5A, ERBB2, DLX5, MAP1B, GBX2, DPYSL5, CXCL12, RUNX3                                                                                                                                                                                                    |
| GOTERM_BP_FAT   | GO:0048667~cell morphogenesis involved in neuron differentiation                                        | 9     | 7,55866E-06 | GDF7, UNC5A, ERBB2, DLX5, MAP1B, GBX2, DPYSL5, CXCL12, RUNX3                                                                                                                                                                                                              |
| SP_PIR_KEYWORDS | glycoprotein                                                                                            | 37    | 8,94936E-06 | CLSTN2, SLC15A1, GDF7, FAM20A, ERBB2, ADCY5, KITLG, ASTN2, MEGF11, MEGF10, CPZ, HRH3, RSP01, UNC5A, PGLYRP2, HS6ST3, PDGFC, HCN4, HTR5A, RET, ST6GAL2, CCKBR, HTR4, BSN, PCDH9, B3GAT2, SMO, TNFRSF10C, ACCN4, LASS1, WNT9B, CACNA1G, CACNA1H, KCNH2, ABCC8, IGFBP3, LRP3 |
| GOTERM_BP_FAT   | GO:0007411~axon guidance                                                                                | 7     | 1,31461E-05 | GDF7, UNC5A, ERBB2, GBX2, DPYSL5, CXCL12, RUNX3                                                                                                                                                                                                                           |
| GOTERM_BP_FAT   | GO:0006928~cell motion                                                                                  | 12    | 1,66821E-05 | FGF19, SMO, RET, GBX2, KITLG                                                                                                                                                                                                                                              |
| GOTERM_BP_FAT   | GO:0014033~neural crest cell differentiation                                                            | 5     | 1,90089E-05 | FGF19, SMO, RET, GBX2, KITLG                                                                                                                                                                                                                                              |
| GOTERM_BP_FAT   | GO:0014032~neural crest cell development                                                                | 5     | 1,90089E-05 | FGF19, SMO, RET, GBX2, KITLG                                                                                                                                                                                                                                              |
| GOTERM_BP_FAT   | GO:0009004~cell morphogenesis involved in differentiation                                               | 9     | 2,32635E-05 | GDF7, UNC5A, ERBB2, DLX5, MAP1B, GBX2, DPYSL5, CXCL12, RUNX3                                                                                                                                                                                                              |
| UP_SEQ_FEATURE  | glycosylation site:N-linked (GlcNAc,...)                                                                | 35    | 2,89804E-05 | CLSTN2, SLC15A1, GDF7, FAM20A, ERBB2, ADCY5, KITLG, ASTN2, MEGF11, MEGF10, CPZ, RSP01, HRH3, UNC5A, PGLYRP2, HS6ST3, PDGFC, HCN4, HTR5A, RET, ST6GAL2, CCKBR, HTR4, PCDH9, B3GAT2, SMO, ACCN4, LASS1, WNT9B, CACNA1G, CACNA1H, KCNH2, ABCC8, IGFBP3, LRP3                 |
| GOTERM_BP_FAT   | GO:0000902~cell morphogenesis                                                                           | 10    | 5,39191E-05 | SMO, GDF7, UNC5A, ERBB2, DLX5, MAP1B, GBX2, DPYSL5, CXCL12, RUNX3                                                                                                                                                                                                         |
| GOTERM_BP_FAT   | GO:0030030~cell projection organization                                                                 | 10    | 6,96308E-05 | SMO, GDF7, UNC5A, ERBB2, DLX5, MAP1B, GBX2, DPYSL5, CXCL12, RUNX3                                                                                                                                                                                                         |
| GOTERM_BP_FAT   | GO:0048483~autonomic nervous system development                                                         | 4     | 0,000101641 | SMO, RET, ERBB2, GBX2                                                                                                                                                                                                                                                     |
| GOTERM_BP_FAT   | GO:0014031~mesenchymal cell development                                                                 | 5     | 0,000108684 | FGF19, SMO, RET, GBX2, KITLG                                                                                                                                                                                                                                              |
| GOTERM_BP_FAT   | GO:0048762~mesenchymal cell differentiation                                                             | 5     | 0,000108684 | FGF19, SMO, RET, GBX2, KITLG                                                                                                                                                                                                                                              |
| GOTERM_BP_FAT   | GO:0060485~mesenchyme development                                                                       | 5     | 0,000117311 | FGF19, SMO, RET, GBX2, KITLG                                                                                                                                                                                                                                              |
| GOTERM_BP_FAT   | GO:0045597~positive regulation of cell differentiation                                                  | 8     | 0,000121128 | SMO, IRX3, THRB, DLX5, MAP1B, KITLG, IGFBP3, GLI3                                                                                                                                                                                                                         |
| GOTERM_BP_FAT   | GO:0032989~cellular component morphogenesis                                                             | 10    | 0,000124206 | SMO, GDF7, UNC5A, ERBB2, DLX5, MAP1B, GBX2, DPYSL5, CXCL12, RUNX3                                                                                                                                                                                                         |
| SP_PIR_KEYWORDS | growth factor                                                                                           | 6     | 0,000229759 | FGF19, GDF7, LASS1, KITLG, PDGFC, CXCL12                                                                                                                                                                                                                                  |
| GOTERM_BP_FAT   | GO:0050678~regulation of epithelial cell proliferation                                                  | 5     | 0,000392792 | HRH3, ERBB2, DLX5, FOXE3, RUNX3                                                                                                                                                                                                                                           |
| GOTERM_BP_FAT   | GO:0051094~positive regulation of developmental process                                                 | 8     | 0,000396727 | SMO, IRX3, THRB, DLX5, MAP1B, KITLG, IGFBP3, GLI3                                                                                                                                                                                                                         |
| GOTERM_BP_FAT   | GO:0008016~regulation of heart contraction                                                              | 5     | 0,000535225 | THRB, CACNA1G, CACNA1H, HCN4, KCNH2                                                                                                                                                                                                                                       |
| SP_PIR_KEYWORDS | signal                                                                                                  | 27    | 0,000583332 | FGF19, CLSTN2, GDF7, FAM20A, ERBB2, KITLG, ASTN2, MEGF11, MEGF10, CXCL12, TIMP3, CPZ, RSP01, UNC5A, HTRA1, PGLYRP2, PDGFC, GPX7, COL8A1, RET, PCDH9, SMO, TNFRSF10C, LASS1, WNT9B, IGFBP3, LRP3                                                                           |
| UP_SEQ_FEATURE  | signal peptide                                                                                          | 27    | 0,000644198 | FGF19, CLSTN2, GDF7, FAM20A, ERBB2, KITLG, ASTN2, MEGF11, MEGF10, CXCL12, TIMP3, CPZ, RSP01, UNC5A, HTRA1, PGLYRP2, PDGFC, GPX7, COL8A1, RET, PCDH9, SMO, TNFRSF10C, LASS1, WNT9B, IGFBP3, LRP3                                                                           |
| GOTERM_BP_FAT   | GO:0001501~skeletal system development                                                                  | 8     | 0,000897323 | SMO, ALOX15, DLX5, SOX5, ZNF232, SOX8, GLI3, DLX5, GBX2, HIF3A, TFAP2A, ALX4, IGFBP3, GLI3                                                                                                                                                                                |
| GOTERM_MF_FAT   | GO:0003700~transcription factor activity                                                                | 14    | 0,000934574 | IRX3, THRB, SOX14, SOX5, ZNF232, SOX8, GLI3, DLX5, GBX2, HIF3A, TFAP2A, ALX4, RUNX3, FOXE3                                                                                                                                                                                |
| GOTERM_BP_FAT   | GO:0050679~positive regulation of epithelial cell proliferation                                         | 4     | 0,001035678 | HRH3, ERBB2, DLX5, FOXE3                                                                                                                                                                                                                                                  |
| UP_SEQ_FEATURE  | disulfide bond                                                                                          | 24    | 0,001135795 | FGF19, ST6GAL2, CCKBR, GDF7, ERBB2, HTRA1, KITLG, ASTN2, MEGF11, TIMP3, CXCL12, MEGF10, CPZ, SMO, ACCN4, TNFRSF10C, RSP01, UNC5A, PGLYRP2, LASS1, PDGFC, IGFBP3, LRP3, HTR5A                                                                                              |
| UP_SEQ_FEATURE  | topological domain:Cytoplasmic                                                                          | 27    | 0,001144859 | CLSTN2, SLC15A1, ERBB2, ADCY5, CABP7, KITLG, ASTN2, MEGF10, HRH3, UNC5A, HS6ST3, SLC30A2, HCN4, HTR5A, RET, ST6GAL2, CCKBR, HTR4, PCDH9, B3GAT2, SMO, ACCN4, CACNA1G, CACNA1H, KCNH2, LRP3, ABCC8                                                                         |
| GOTERM_MF_FAT   | GO:0008083~growth factor activity                                                                       | 6     | 0,001249795 | FGF19, GDF7, LASS1, KITLG, PDGFC, CXCL12                                                                                                                                                                                                                                  |
| SP_PIR_KEYWORDS | disulfide bond                                                                                          | 24    | 0,001714715 | FGF19, ST6GAL2, CCKBR, GDF7, ERBB2, HTRA1, KITLG, ASTN2, MEGF11, TIMP3, CXCL12, MEGF10, CPZ, SMO, ACCN4, TNFRSF10C, RSP01, UNC5A, PGLYRP2, LASS1, PDGFC, IGFBP3, LRP3, HTR5A                                                                                              |
| SP_PIR_KEYWORDS | dna-binding                                                                                             | 18    | 0,001748036 | IRX3, MTERF, ZNF264, THRB, SOX14, SOX5, ZNF232, PRDM16, SOX8, GLI3, DLX5, ZNF681, HIF3A, GBX2, TFAP2A, ALX4, RUNX3, FOXE3                                                                                                                                                 |
| GOTERM_BP_FAT   | GO:0016477~cell migration                                                                               | 7     | 0,002226607 | FGF19, SMO, RET, ARHGGEF7, GBX2, KITLG, CXCL12                                                                                                                                                                                                                            |
| KEGG_PATHWAY    | hsa05200:Pathways in cancer                                                                             | 8     | 0,002975368 | FGF19, SMO, RET, ERBB2, WNT9B, KITLG, GLI3, DAPK1                                                                                                                                                                                                                         |
| GOTERM_BP_FAT   | GO:0035239~tube morphogenesis                                                                           | 5     | 0,003407516 | RET, GBX2, TFAP2A, CXCL12, GLI3                                                                                                                                                                                                                                           |
| GOTERM_BP_FAT   | GO:0051674~localization of cell                                                                         | 7     | 0,003771569 | FGF19, SMO, RET, ARHGGEF7, GBX2, KITLG, CXCL12                                                                                                                                                                                                                            |
| GOTERM_BP_FAT   | GO:0048870~cell motility                                                                                | 7     | 0,003771569 | FGF19, SMO, RET, ARHGGEF7, GBX2, KITLG, CXCL12                                                                                                                                                                                                                            |
| KEGG_PATHWAY    | hsa04020:Calcium signaling pathway                                                                      | 6     | 0,003836019 | CCKBR, ERBB2, HTRA1, CACNA1G, CACNA1H, HTR5A                                                                                                                                                                                                                              |
| GOTERM_BP_FAT   | GO:0008284~positive regulation of cell proliferation                                                    | 8     | 0,003931603 | SMO, HRH3, CCKBR, ERBB2, DLX5, KITLG, PDGFC, FOXE3                                                                                                                                                                                                                        |
| GOTERM_BP_FAT   | GO:0048562~embryonic organ morphogenesis                                                                | 5     | 0,004019026 | DLX5, GBX2, TFAP2A, ALX4, GLI3                                                                                                                                                                                                                                            |
| SP_PIR_KEYWORDS | Secreted                                                                                                | 16    | 0,004261695 | FGF19, GDF7, FAM20A, KITLG, CXCL12, TIMP3, CPZ, RSP01, HTRA1, PGLYRP2, LASS1, WNT9B, PDGFC, GPX7, COL8A1, IGFBP3                                                                                                                                                          |
| GOTERM_BP_FAT   | GO:0021915~neural tube development                                                                      | 4     | 0,004433906 | SMO, GBX2, TFAP2A, GLI3                                                                                                                                                                                                                                                   |
| GOTERM_BP_FAT   | GO:0042127~regulation of cell proliferation                                                             | 11    | 0,004572205 | SMO, HRH3, CCKBR, ERBB2, DLX5, KITLG, PDGFC, IGFBP3, GLI3, FOXE3, RUNX3                                                                                                                                                                                                   |
| GOTERM_CC_FAT   | GO:0044421~extracellular region part                                                                    | 12    | 0,004599281 | RSP01, GDF7, HTRA1, LASS1, WNT9B, KITLG, PDGFC, COL8A1, IGFBP3, TIMP3, CXCL12, CPZ                                                                                                                                                                                        |
| GOTERM_BP_FAT   | GO:0045165~cell fate commitment                                                                         | 5     | 0,004700989 | SMO, GDF7, SOX5, SOX8, GLI3                                                                                                                                                                                                                                               |
| GOTERM_BP_FAT   | GO:0007423~sensory organ development                                                                    | 6     | 0,005143071 | ERBB2, DLX5, GBX2, COL8A1, GLI3, FOXE3                                                                                                                                                                                                                                    |
| GOTERM_BP_FAT   | GO:0043009~chordate embryonic development                                                               | 7     | 0,005430578 | SMO, GBX2, TFAP2A, HCN4, ALX4, SOX8, GLI3                                                                                                                                                                                                                                 |
| GOTERM_BP_FAT   | GO:0009792~embryonic development ending in birth or egg hatching                                        | 7     | 0,005670447 | SMO, GBX2, TFAP2A, HCN4, ALX4, SOX8, GLI3                                                                                                                                                                                                                                 |
| GOTERM_BP_FAT   | GO:0019932~second-messenger-mediated signaling                                                          | 6     | 0,005730465 | HRH3, CCKBR, ADCY5, ERBB2, HTRA1, HTR5A                                                                                                                                                                                                                                   |
| GOTERM_MF_FAT   | GO:0046873~metal ion transmembrane transporter activity                                                 | 7     | 0,005868308 | ACCN4, CACNA1G, CACNA1H, SLC30A2, HCN4, KCNH2, ABCC8                                                                                                                                                                                                                      |
| GOTERM_MF_FAT   | GO:0030528~transcription regulator activity                                                             | 16    | 0,006749854 | IRX3, MTERF, THRB, SOX14, SOX5, ZNF232, PRDM16, SOX8, GLI3, DLX5, GBX2, HIF3A, TFAP2A, ALX4, RUNX3, FOXE3                                                                                                                                                                 |
| GOTERM_CC_FAT   | GO:0043025~cell soma                                                                                    | 5     | 0,007928727 | SMO, MAP1B, CACNA1G, DPYSL5, CACNA1H                                                                                                                                                                                                                                      |
| UP_SEQ_FEATURE  | topological domain:Extracellular                                                                        | 21    | 0,008486571 | RET, CLSTN2, SLC15A1, CCKBR, ERBB2, ADCY5, HTRA1, KITLG, PCDH9, CABP7, ASTN2, MEGF10, SMO, ACCN4, HRH3, UNC5A, CACNA1G, CACNA1H, ABCC8, LRP3, HTR5A                                                                                                                       |
| SP_PIR_KEYWORDS | transcription regulation                                                                                | 17    | 0,009600471 | IRX3, MTERF, ZNF264, THRB, SOX14, SOX5, ZNF232, PRDM16, SOX8, GLI3, ZNF681, GBX2, HIF3A, TFAP2A, ALX4, RUNX3, FOXE3                                                                                                                                                       |
| GOTERM_BP_FAT   | GO:0048568~embryonic organ development                                                                  | 5     | 0,009864373 | DLX5, GBX2, TFAP2A, ALX4, GLI3                                                                                                                                                                                                                                            |
| GOTERM_MF_FAT   | GO:0043565~sequence-specific DNA binding                                                                | 9     | 0,010501237 | IRX3, THRB, SOX14, DLX5, GBX2, PRDM16, ALX4, GLI3, FOXE3                                                                                                                                                                                                                  |
| GOTERM_BP_FAT   | GO:0045935~positive regulation of nucleobase, nucleoside, nucleotide and nucleic acid metabolic process | 9     | 0,010642558 | THRB, GDF7, SOX5, KITLG, PDGFC, PRDM16, ALX4, SOX8, GLI3                                                                                                                                                                                                                  |
| SP_PIR_KEYWORDS | Transcription                                                                                           | 17    | 0,011724073 | IRX3, MTERF, ZNF264, THRB, SOX14, SOX5, ZNF232, PRDM16, SOX8, GLI3, ZNF681, GBX2, HIF3A, TFAP2A, ALX4, RUNX3, FOXE3                                                                                                                                                       |
| GOTERM_BP_FAT   | GO:0040007~growth                                                                                       | 5     | 0,012174566 | SMO, ST6GAL2, GDF7, TIMP3, GLI3                                                                                                                                                                                                                                           |

|                 |                                                                                  |    |             |                                                                                                                                                                                                                                |
|-----------------|----------------------------------------------------------------------------------|----|-------------|--------------------------------------------------------------------------------------------------------------------------------------------------------------------------------------------------------------------------------|
| GOTERM_BP_FAT   | GO:0051173~positive regulation of nitrogen compound metabolic process            | 9  | 0,012705889 | THRB, GDF7, SOX5, KITLG, PDGFC, PRDM16, ALX4, SOX8, GLI3                                                                                                                                                                       |
| GOTERM_BP_FAT   | GO:0008015~blood circulation                                                     | 5  | 0,012859933 | HRH3, CACNA1G, HCN4, KCNH2, CXCL12                                                                                                                                                                                             |
| GOTERM_BP_FAT   | GO:0003013~circulatory system process                                            | 5  | 0,012859933 | HRH3, CACNA1G, HCN4, KCNH2, CXCL12                                                                                                                                                                                             |
| GOTERM_BP_FAT   | GO:0021700~developmental maturation                                              | 4  | 0,013158637 | RET, MAP1B, SOX8, RUNX3                                                                                                                                                                                                        |
| INTERPRO        | IPR005445:Voltage-dependent calcium channel, T-type, alpha-1 subunit             | 2  | 0,013624767 | CACNA1G, CACNA1H                                                                                                                                                                                                               |
| GOTERM_BP_FAT   | GO:0010557~positive regulation of macromolecule biosynthetic process             | 9  | 0,013842177 | THRB, GDF7, SOX5, KITLG, PDGFC, PRDM16, ALX4, SOX8, GLI3                                                                                                                                                                       |
| GOTERM_BP_FAT   | GO:0006351~transcription, DNA-dependent                                          | 6  | 0,013855605 | MTERF, THRB, HIF3A, SOX5, FOXE3, RUNX3                                                                                                                                                                                         |
| INTERPRO        | IPR005821:Ion transport                                                          | 4  | 0,013892616 | CACNA1G, CACNA1H, HCN4, KCNH2                                                                                                                                                                                                  |
| GOTERM_BP_FAT   | GO:0021910~smoothed signaling pathway involved in ventral spinal cord patterning | 2  | 0,014566609 | SMO, GLI3                                                                                                                                                                                                                      |
| GOTERM_BP_FAT   | GO:0032774~RNA biosynthetic process                                              | 6  | 0,014619999 | MTERF, THRB, HIF3A, SOX5, FOXE3, RUNX3                                                                                                                                                                                         |
| GOTERM_MF_FAT   | GO:0008332~low voltage-gated calcium channel activity                            | 2  | 0,014945715 | CACNA1G, CACNA1H                                                                                                                                                                                                               |
| UP_SEQ_FEATURE  | DNA-binding region:HMG box                                                       | 3  | 0,014955966 | SOX14, SOX5, SOX8                                                                                                                                                                                                              |
| GOTERM_CC_FAT   | GO:0042995~cell projection                                                       | 9  | 0,015631578 | SMO, ARHGFE7, ERBB2, MAP1B, CACNA1G, DPYSL5, CACNA1H, HCN4, GLI3                                                                                                                                                               |
| UP_SEQ_FEATURE  | transmembrane region                                                             | 31 | 0,015783283 | CYB5R1, CLSTN2, SLC15A1, ERBB2, ADCY5, CABP7, KITLG, ASTN2, MEGF11, MEGF10, HRH3, UNC5A, HS6ST3, SLC30A2, HCN4, HTR5A, RET, ST6GAL2, CCKBR, HTR4, PCDH9, UCP1, B3GAT2, SMO, ACCN4, LASS1, CACNA1G, CACNA1H, KCNH2, ABCC8, LRP3 |
| GOTERM_BP_FAT   | GO:0048598~embryonic morphogenesis                                               | 6  | 0,016867529 | RET, DLX5, GBX2, TFAP2A, ALX4, GLI3                                                                                                                                                                                            |
| SP_PIR_KEYWORDS | transmembrane                                                                    | 31 | 0,017190163 | CYB5R1, CLSTN2, SLC15A1, ERBB2, ADCY5, CABP7, KITLG, ASTN2, MEGF11, MEGF10, HRH3, UNC5A, HS6ST3, SLC30A2, HCN4, HTR5A, RET, ST6GAL2, CCKBR, HTR4, PCDH9, UCP1, B3GAT2, SMO, ACCN4, LASS1, CACNA1G, CACNA1H, KCNH2, ABCC8, LRP3 |
| GOTERM_BP_FAT   | GO:0044057~regulation of system process                                          | 6  | 0,017299577 | THRB, MAP1B, CACNA1G, CACNA1H, HCN4, KCNH2                                                                                                                                                                                     |
| GOTERM_BP_FAT   | GO:0060284~regulation of cell development                                        | 5  | 0,017775598 | SMO, IRX3, MAP1B, SOX5, IGFBP3                                                                                                                                                                                                 |
| GOTERM_BP_FAT   | GO:0006812~cation transport                                                      | 8  | 0,017800608 | ACCN4, CACNA1G, CACNA1H, SLC30A2, UCP1, HCN4, KCNH2, ABCC8                                                                                                                                                                     |
| GOTERM_BP_FAT   | GO:0031328~positive regulation of cellular biosynthetic process                  | 9  | 0,017841452 | THRB, GDF7, SOX5, KITLG, PDGFC, PRDM16, ALX4, SOX8, GLI3                                                                                                                                                                       |
| GOTERM_MF_FAT   | GO:0008227~amine receptor activity                                               | 3  | 0,017851256 | HRH3, HTR4, HTR5A                                                                                                                                                                                                              |
| GOTERM_BP_FAT   | GO:0009891~positive regulation of biosynthetic process                           | 9  | 0,019294201 | THRB, GDF7, SOX5, KITLG, PDGFC, PRDM16, ALX4, SOX8, GLI3                                                                                                                                                                       |
| GOTERM_BP_FAT   | GO:0008283~cell proliferation                                                    | 7  | 0,019313594 | CCKBR, ERBB2, GBX2, KITLG, COL8A1, CXCL12, RUNX3                                                                                                                                                                               |
| GOTERM_CC_FAT   | GO:0005576~extracellular region                                                  | 17 | 0,020432577 | FGF19, GDF7, FAM20A, ERBB2, KITLG, CXCL12, TIMP3, CPZ, RSP01, HTRA1, PGLYRP2, LASS1, WNT9B, PDGFC, GPX7, COL8A1, IGFBP3                                                                                                        |
| GOTERM_BP_FAT   | GO:0006355~regulation of transcription, DNA-dependent                            | 16 | 0,021716587 | IRX3, ZNF264, THRB, SOX14, SOX5, ZNF232, PRDM16, SOX8, DLX5, HIF3A, GBX2, TFAP2A, ALX4, KCNH2, RUNX3, FOXE3                                                                                                                    |
| GOTERM_CC_FAT   | GO:0043005~neuron projection                                                     | 6  | 0,021894608 | ARHGFE7, MAP1B, CACNA1G, DPYSL5, CACNA1H, HCN4                                                                                                                                                                                 |
| GOTERM_BP_FAT   | GO:0035295~tube development                                                      | 5  | 0,022386494 | RET, GBX2, TFAP2A, CXCL12, GLI3                                                                                                                                                                                                |
| UP_SEQ_FEATURE  | compositionally biased region:Poly-His                                           | 3  | 0,022785563 | CACNA1G, CACNA1H, CECR6                                                                                                                                                                                                        |
| INTERPRO        | IPR000910:high mobility group, HMG1/HMG2                                         | 3  | 0,024361302 | SOX14, SOX5, SOX8                                                                                                                                                                                                              |
| SP_PIR_KEYWORDS | voltage-gated channel                                                            | 4  | 0,025486877 | CACNA1G, CACNA1H, HCN4, KCNH2                                                                                                                                                                                                  |
| GOTERM_BP_FAT   | GO:0030001~metal ion transport                                                   | 7  | 0,025547166 | ACCN4, CACNA1G, CACNA1H, SLC30A2, HCN4, KCNH2, ABCC8                                                                                                                                                                           |
| GOTERM_BP_FAT   | GO:0019935~cyclic-nucleotide-mediated signaling                                  | 4  | 0,025577199 | HRH3, ADCY5, HTR4, HTR5A                                                                                                                                                                                                       |
| UP_SEQ_FEATURE  | compositionally biased region:Poly-Ala                                           | 6  | 0,025720883 | IRX3, HRH3, LASS1, GBX2, CECR6, FOXE3                                                                                                                                                                                          |
| GOTERM_BP_FAT   | GO:0051252~regulation of RNA metabolic process                                   | 16 | 0,026045843 | IRX3, ZNF264, THRB, SOX14, SOX5, ZNF232, PRDM16, SOX8, DLX5, HIF3A, GBX2, TFAP2A, ALX4, KCNH2, RUNX3, FOXE3                                                                                                                    |
| GOTERM_BP_FAT   | GO:0051956~negative regulation of amino acid transport                           | 2  | 0,028923178 | HRH3, SLC15A1                                                                                                                                                                                                                  |
| GOTERM_BP_FAT   | GO:0048704~embryonic skeletal system morphogenesis                               | 3  | 0,031498918 | TFAP2A, ALX4, GLI3                                                                                                                                                                                                             |
| GOTERM_BP_FAT   | GO:0006873~cellular ion homeostasis                                              | 6  | 0,035569163 | HRH3, CCKBR, ERBB2, CACNA1G, KCNH2, CXCL12                                                                                                                                                                                     |
| SMART           | SM00398:HMG                                                                      | 3  | 0,036821044 | SOX14, SOX5, SOX8                                                                                                                                                                                                              |
| GOTERM_MF_FAT   | GO:0022843~voltage-gated cation channel activity                                 | 4  | 0,037317825 | CACNA1G, CACNA1H, HCN4, KCNH2                                                                                                                                                                                                  |
| GOTERM_BP_FAT   | GO:0055082~cellular chemical homeostasis                                         | 6  | 0,0376921   | HRH3, CCKBR, ERBB2, CACNA1G, KCNH2, CXCL12                                                                                                                                                                                     |
| UP_SEQ_FEATURE  | compositionally biased region:Poly-Arg                                           | 4  | 0,038294931 | GBX2, CACNA1H, BSN, FOXE3                                                                                                                                                                                                      |
| GOTERM_BP_FAT   | GO:0032332~positive regulation of chondrocyte differentiation                    | 2  | 0,038379918 | THRB, GLI3                                                                                                                                                                                                                     |
| GOTERM_BP_FAT   | GO:0051953~negative regulation of amine transport                                | 2  | 0,038379918 | HRH3, SLC15A1                                                                                                                                                                                                                  |
| GOTERM_BP_FAT   | GO:0006936~muscle contraction                                                    | 4  | 0,0386893   | CACNA1G, CACNA1H, HCN4, KCNH2                                                                                                                                                                                                  |
| GOTERM_BP_FAT   | GO:0045449~regulation of transcription                                           | 20 | 0,039128664 | IRX3, MTERF, ZNF264, THRB, GDF7, SOX14, SOX5, ZNF232, PRDM16, SOX8, GLI3, DLX5, ZNF681, HIF3A, GBX2, TFAP2A, ALX4, KCNH2, RUNX3, FOXE3                                                                                         |
| GOTERM_BP_FAT   | GO:0048754~branching morphogenesis of a tube                                     | 3  | 0,040047403 | GBX2, CXCL12, GLI3                                                                                                                                                                                                             |
| UP_SEQ_FEATURE  | domain:EGF-like 3                                                                | 3  | 0,040336425 | ASTN2, MEGF11, MEGF10                                                                                                                                                                                                          |
| GOTERM_CC_FAT   | GO:0005615~extracellular space                                                   | 8  | 0,040504106 | RSP01, GDF7, HTRA1, LASS1, KITLG, PDGFC, IGFBP3, CXCL12                                                                                                                                                                        |
| GOTERM_BP_FAT   | GO:0042981~regulation of apoptosis                                               | 9  | 0,041032521 | SMO, ARHGFE7, ERBB2, ALX4, IGFBP3, TIMP3, GLI3, RUNX3, DAPK1                                                                                                                                                                   |
| GOTERM_CC_FAT   | GO:0030425~dendrite                                                              | 4  | 0,041066113 | MAP1B, CACNA1G, DPYSL5, CACNA1H                                                                                                                                                                                                |
| BIOCARTA        | h_shhPathway:Sonic Hedgehog (Shh) Pathway                                        | 2  | 0,041104281 | SMO, GLI3                                                                                                                                                                                                                      |
| GOTERM_BP_FAT   | GO:0007389~pattern specification process                                         | 5  | 0,041253852 | SMO, GBX2, ALX4, CXCL12, GLI3                                                                                                                                                                                                  |
| UP_SEQ_FEATURE  | site:Calcium ion selectivity and permeability                                    | 2  | 0,041589994 | CACNA1G, CACNA1H                                                                                                                                                                                                               |
| GOTERM_BP_FAT   | GO:0060562~epithelial tube morphogenesis                                         | 3  | 0,042307444 | RET, TFAP2A, GLI3                                                                                                                                                                                                              |
| GOTERM_BP_FAT   | GO:0043067~regulation of programmed cell death                                   | 9  | 0,04309474  | SMO, ARHGFE7, ERBB2, ALX4, IGFBP3, TIMP3, GLI3, RUNX3, DAPK1                                                                                                                                                                   |
| PIR_SUPERFAMILY | PIRSF037272:bone morphogenetic protein                                           | 2  | 0,043517507 | GDF7, LASS1                                                                                                                                                                                                                    |
| KEGG_PATHWAY    | hsa05217:Basal cell carcinoma                                                    | 3  | 0,043729773 | SMO, WNT9B, GLI3                                                                                                                                                                                                               |
| GOTERM_BP_FAT   | GO:0010941~regulation of cell death                                              | 9  | 0,043885699 | SMO, ARHGFE7, ERBB2, ALX4, IGFBP3, TIMP3, GLI3, RUNX3, DAPK1                                                                                                                                                                   |
| GOTERM_BP_FAT   | GO:0031099~regeneration                                                          | 3  | 0,044614401 | SMO, MAP1B, TIMP3                                                                                                                                                                                                              |
| KEGG_PATHWAY    | hsa04340:Hedgehog signaling pathway                                              | 3  | 0,045180078 | SMO, WNT9B, GLI3                                                                                                                                                                                                               |
| SP_PIR_KEYWORDS | ionic channel                                                                    | 5  | 0,045281674 | ACCN4, CACNA1G, CACNA1H, HCN4, KCNH2                                                                                                                                                                                           |
| GOTERM_BP_FAT   | GO:0050767~regulation of neurogenesis                                            | 4  | 0,047353835 | SMO, IRX3, MAP1B, SOX5                                                                                                                                                                                                         |
| GOTERM_BP_FAT   | GO:0021513~spinal cord dorsal/ventral patterning                                 | 2  | 0,047745946 | SMO, GLI3                                                                                                                                                                                                                      |
| GOTERM_BP_FAT   | GO:0051955~regulation of amino acid transport                                    | 2  | 0,047745946 | HRH3, SLC15A1                                                                                                                                                                                                                  |
| GOTERM_BP_FAT   | GO:0032891~negative regulation of organic acid transport                         | 2  | 0,047745946 | HRH3, SLC15A1                                                                                                                                                                                                                  |
| GOTERM_BP_FAT   | GO:0003012~muscle system process                                                 | 4  | 0,048765241 | CACNA1G, CACNA1H, HCN4, KCNH2                                                                                                                                                                                                  |
| GOTERM_MF_FAT   | GO:0005261~cation channel activity                                               | 5  | 0,048789731 | ACCN4, CACNA1G, CACNA1H, HCN4, KCNH2                                                                                                                                                                                           |
| GOTERM_BP_FAT   | GO:0050801~ion homeostasis                                                       | 6  | 0,049045365 | HRH3, CCKBR, ERBB2, CACNA1G, KCNH2, CXCL12                                                                                                                                                                                     |
| UP_SEQ_FEATURE  | domain:EGF-like 12                                                               | 2  | 0,049700621 | MEGF11, MEGF10                                                                                                                                                                                                                 |
| GOTERM_BP_FAT   | GO:0001763~morphogenesis of a branching structure                                | 3  | 0,050579893 | GBX2, CXCL12, GLI3                                                                                                                                                                                                             |
| GOTERM_BP_FAT   | GO:0048469~cell maturation                                                       | 3  | 0,05180588  | RET, SOX8, RUNX3                                                                                                                                                                                                               |
| GOTERM_BP_FAT   | GO:0001932~regulation of protein amino acid phosphorylation                      | 4  | 0,052383691 | GDF7, KITLG, PDGFC, IGFBP3                                                                                                                                                                                                     |
| INTERPRO        | IPR003938:Potassium channel, voltage-dependent, EAG/ELK/ERG                      | 2  | 0,053409413 | HCN4, KCNH2                                                                                                                                                                                                                    |
| UP_SEQ_FEATURE  | domain:EGF-like 2                                                                | 3  | 0,053729812 | ASTN2, MEGF11, MEGF10                                                                                                                                                                                                          |
| UP_SEQ_FEATURE  | domain:EGF-like 11                                                               | 2  | 0,053730475 | MEGF11, MEGF10                                                                                                                                                                                                                 |
| GOTERM_BP_FAT   | GO:0048706~embryonic skeletal system development                                 | 3  | 0,054289695 | TFAP2A, ALX4, GLI3                                                                                                                                                                                                             |
| SP_PIR_KEYWORDS | DNA binding                                                                      | 5  | 0,055349791 | THRB, GBX2, SOX5, TFAP2A, GLI3                                                                                                                                                                                                 |
| GOTERM_BP_FAT   | GO:0010604~positive regulation of macromolecule metabolic process                | 9  | 0,055991487 | THRB, GDF7, SOX5, KITLG, PDGFC, PRDM16, ALX4, SOX8, GLI3                                                                                                                                                                       |
| GOTERM_BP_FAT   | GO:0045941~positive regulation of transcription                                  | 7  | 0,056505453 | THRB, GDF7, SOX5, PRDM16, ALX4, SOX8, GLI3                                                                                                                                                                                     |
| GOTERM_BP_FAT   | GO:0021511~spinal cord patterning                                                | 2  | 0,057022119 | SMO, GLI3                                                                                                                                                                                                                      |
| GOTERM_BP_FAT   | GO:0031102~neuron projection regeneration                                        | 2  | 0,057022119 | SMO, MAP1B                                                                                                                                                                                                                     |

|                 |                                                                                              |    |             |                                                                                                                                                                                                                                           |
|-----------------|----------------------------------------------------------------------------------------------|----|-------------|-------------------------------------------------------------------------------------------------------------------------------------------------------------------------------------------------------------------------------------------|
| GOTERM_BP_FAT   | GO:0048729~tissue morphogenesis                                                              | 4  | 0,057662483 | RET, TFAP2A, GLI3, RUNX3                                                                                                                                                                                                                  |
| UP_SEQ_FEATURE  | domain:EGF-like 14                                                                           | 2  | 0,057743451 | MEGF11, MEGF10                                                                                                                                                                                                                            |
| GOTERM_BP_FAT   | GO:0055085~transmembrane transport                                                           | 7  | 0,058493123 | CACNA1G, CACNA1H, SLC30A2, UCP1, HCN4, KCNH2, ABCC8                                                                                                                                                                                       |
| GOTERM_BP_FAT   | GO:0006874~cellular calcium ion homeostasis                                                  | 4  | 0,059999708 | HRH3, CCKBR, CACNA1G, CXCL12                                                                                                                                                                                                              |
| GOTERM_BP_FAT   | GO:0007166~cell surface receptor linked signal transduction                                  | 15 | 0,061411681 | RET, CCKBR, GDF7, ERBB2, ADCY5, HTR4, CXCL12, GLI3, CPZ, SMO, RSP01, HRH3, WNT9B, PDGFC, HTR5A                                                                                                                                            |
| GOTERM_BP_FAT   | GO:0008045~motor axon guidance                                                               | 2  | 0,061626776 | ERBB2, CXCL12                                                                                                                                                                                                                             |
| GOTERM_MF_FAT   | GO:0004993~serotonin receptor activity                                                       | 2  | 0,063193785 | HTR4, HTR5A                                                                                                                                                                                                                               |
| GOTERM_BP_FAT   | GO:0010628~positive regulation of gene expression                                            | 7  | 0,063435163 | THRB, GDF7, SOX5, PRDM16, ALX4, SOX8, GLI3                                                                                                                                                                                                |
| GOTERM_MF_FAT   | GO:0003677~DNA binding                                                                       | 18 | 0,063594105 | IRX3, MTERF, ZNF264, THRB, SOX14, SOX5, ZNF232, PRDM16, SOX8, GLI3, DLX5, ZNF681, HIF3A, GBX2, TFAP2A, ALX4, RUNX3, FOXE3                                                                                                                 |
| GOTERM_CC_FAT   | GO:0043209~myelin sheath                                                                     | 2  | 0,063780894 | HRH3, ERBB2                                                                                                                                                                                                                               |
| GOTERM_BP_FAT   | GO:0055074~calcium ion homeostasis                                                           | 4  | 0,063993274 | HRH3, CCKBR, CACNA1G, CXCL12                                                                                                                                                                                                              |
| SP_PIR_KEYWORDS | Growth factor binding                                                                        | 2  | 0,065315125 | HTRA1, IGFBP3                                                                                                                                                                                                                             |
| UP_SEQ_FEATURE  | domain:EGF-like 10                                                                           | 2  | 0,065719044 | MEGF11, MEGF10                                                                                                                                                                                                                            |
| UP_SEQ_FEATURE  | domain:EGF-like 13                                                                           | 2  | 0,065719044 | MEGF11, MEGF10                                                                                                                                                                                                                            |
| GOTERM_BP_FAT   | GO:0032330~regulation of chondrocyte differentiation                                         | 2  | 0,066209287 | THRB, GLI3                                                                                                                                                                                                                                |
| INTERPRO        | IPR011489:EMI domain                                                                         | 2  | 0,066315744 | MEGF11, MEGF10                                                                                                                                                                                                                            |
| GOTERM_BP_FAT   | GO:0051960~regulation of nervous system development                                          | 4  | 0,067275239 | SMO, IRX3, MAP1B, SOX5                                                                                                                                                                                                                    |
| GOTERM_BP_FAT   | GO:0035113~embryonic appendage morphogenesis                                                 | 3  | 0,067312548 | DLX5, ALX4, GLI3                                                                                                                                                                                                                          |
| GOTERM_BP_FAT   | GO:0048589~developmental growth                                                              | 3  | 0,067312548 | SMO, TIMP3, GLI3                                                                                                                                                                                                                          |
| GOTERM_BP_FAT   | GO:0030326~embryonic limb morphogenesis                                                      | 3  | 0,067312548 | DLX5, ALX4, GLI3                                                                                                                                                                                                                          |
| SP_PIR_KEYWORDS | receptor                                                                                     | 12 | 0,067452435 | SMO, RET, TNFRSF10C, HRH3, THRB, CCKBR, UNC5A, ERBB2, HTR4, ABCC8, LRP3, HTR5A                                                                                                                                                            |
| KEGG_PATHWAY    | hsa04080:Neuroactive ligand-receptor interaction                                             | 5  | 0,067901428 | HRH3, THRB, CCKBR, HTR4, HTR5A                                                                                                                                                                                                            |
| GOTERM_BP_FAT   | GO:0015672~monovalent inorganic cation transport                                             | 5  | 0,069513328 | ACCN4, UCP1, HCN4, KCNH2, ABCC8                                                                                                                                                                                                           |
| UP_SEQ_FEATURE  | domain:EMI                                                                                   | 2  | 0,0696818   | MEGF11, MEGF10                                                                                                                                                                                                                            |
| GOTERM_CC_FAT   | GO:0016021~integral to membrane                                                              | 32 | 0,070230564 | CYB5R1, CLSTN2, SLC15A1, ERBB2, ADCY5, CABP7, KITLG, ASTN2, MEGF11, MEGF10, HRH3, UNC5A, HS6ST3, SLC30A2, HCN4, HTR5A, RET, ST6GAL2, CCKBR, HTR4, PCDH9, UCP1, B3GAT2, SMO, TNFRSF10C, ACCN4, LASS1, CACNA1G, CACNA1H, KCNH2, ABCC8, LRP3 |
| GOTERM_BP_FAT   | GO:0006875~cellular metal ion homeostasis                                                    | 4  | 0,070633381 | HRH3, CCKBR, CACNA1G, CXCL12                                                                                                                                                                                                              |
| GOTERM_BP_FAT   | GO:0003002~regionalization                                                                   | 4  | 0,071484679 | SMO, GBX2, ALX4, GLI3                                                                                                                                                                                                                     |
| SP_PIR_KEYWORDS | Proto-oncogene                                                                               | 4  | 0,073108059 | SMO, RET, THRB, ERBB2                                                                                                                                                                                                                     |
| GOTERM_MF_FAT   | GO:0022832~voltage-gated channel activity                                                    | 4  | 0,074126036 | CACNA1G, CACNA1H, HCN4, KCNH2                                                                                                                                                                                                             |
| GOTERM_MF_FAT   | GO:0005244~voltage-gated ion channel activity                                                | 4  | 0,074126036 | CACNA1G, CACNA1H, HCN4, KCNH2                                                                                                                                                                                                             |
| GOTERM_BP_FAT   | GO:0019725~cellular homeostasis                                                              | 6  | 0,076713719 | HRH3, CCKBR, ERBB2, CACNA1G, KCNH2, CXCL12                                                                                                                                                                                                |
| GOTERM_BP_FAT   | GO:0042325~regulation of phosphorylation                                                     | 6  | 0,076713719 | GDF7, ADCY5, ERBB2, KITLG, PDGFC, IGFBP3                                                                                                                                                                                                  |
| GOTERM_BP_FAT   | GO:0055065~metal ion homeostasis                                                             | 4  | 0,078461435 | HRH3, CCKBR, CACNA1G, CXCL12                                                                                                                                                                                                              |
| GOTERM_BP_FAT   | GO:0006350~transcription                                                                     | 16 | 0,078590127 | MTERF, ZNF264, THRB, SOX14, SOX5, ZNF232, PRDM16, SOX8, GLI3, ZNF681, GBX2, HIF3A, TFAP2A, ALX4, RUNX3, FOXE3                                                                                                                             |
| INTERPRO        | IPR006212:Furin-like repeat                                                                  | 2  | 0,079048387 | RSP01, ERBB2                                                                                                                                                                                                                              |
| GOTERM_BP_FAT   | GO:0006811~ion transport                                                                     | 8  | 0,079509923 | ACCN4, CACNA1G, CACNA1H, SLC30A2, UCP1, HCN4, KCNH2, ABCC8                                                                                                                                                                                |
| GOTERM_BP_FAT   | GO:0042307~positive regulation of protein import into nucleus                                | 2  | 0,079824989 | SMO, GLI3                                                                                                                                                                                                                                 |
| GOTERM_BP_FAT   | GO:0030512~negative regulation of transforming growth factor beta receptor signaling pathway | 2  | 0,079824989 | HTRA1, PRDM16                                                                                                                                                                                                                             |
| GOTERM_BP_FAT   | GO:0032890~regulation of organic acid transport                                              | 2  | 0,079824989 | HRH3, SLC15A1                                                                                                                                                                                                                             |
| UP_SEQ_FEATURE  | domain:IGFBP N-terminal                                                                      | 2  | 0,081470735 | HTRA1, IGFBP3                                                                                                                                                                                                                             |
| SP_PIR_KEYWORDS | extracellular matrix                                                                         | 4  | 0,081499943 | WNT9B, COL8A1, TIMP3, CPZ                                                                                                                                                                                                                 |
| SP_PIR_KEYWORDS | Homeobox                                                                                     | 4  | 0,082282888 | IRX3, DLX5, GBX2, ALX4                                                                                                                                                                                                                    |
| GOTERM_BP_FAT   | GO:0035108~limb morphogenesis                                                                | 3  | 0,084140441 | DLX5, ALX4, GLI3                                                                                                                                                                                                                          |
| GOTERM_BP_FAT   | GO:0035107~appendage morphogenesis                                                           | 3  | 0,084140441 | DLX5, ALX4, GLI3                                                                                                                                                                                                                          |
| UP_SEQ_FEATURE  | domain:TSP type-1                                                                            | 2  | 0,085367497 | RSP01, UNC5A                                                                                                                                                                                                                              |
| GOTERM_BP_FAT   | GO:0002009~morphogenesis of an epithelium                                                    | 3  | 0,087059513 | RET, TFAP2A, GLI3                                                                                                                                                                                                                         |
| INTERPRO        | IPR002126:Cadherin                                                                           | 3  | 0,087146558 | RET, CLSTN2, PCDH9                                                                                                                                                                                                                        |
| INTERPRO        | IPR000867:Insulin-like growth factor-binding protein, IGFBP                                  | 2  | 0,087441463 | HTRA1, IGFBP3                                                                                                                                                                                                                             |
| INTERPRO        | IPR000024:Frizzled cysteine-rich domain                                                      | 2  | 0,087441463 | SMO, CPZ                                                                                                                                                                                                                                  |
| GOTERM_BP_FAT   | GO:0019220~regulation of phosphate metabolic process                                         | 6  | 0,087503969 | GDF7, ADCY5, ERBB2, KITLG, PDGFC, IGFBP3                                                                                                                                                                                                  |
| GOTERM_BP_FAT   | GO:0051174~regulation of phosphorus metabolic process                                        | 6  | 0,087503969 | GDF7, ADCY5, ERBB2, KITLG, PDGFC, IGFBP3                                                                                                                                                                                                  |
| GOTERM_BP_FAT   | GO:0007507~heart development                                                                 | 4  | 0,087586879 | FGF19, SMO, ERBB2, GLI3                                                                                                                                                                                                                   |
| GOTERM_BP_FAT   | GO:0007224~smoothed signaling pathway                                                        | 2  | 0,088793305 | SMO, GLI3                                                                                                                                                                                                                                 |
| GOTERM_BP_FAT   | GO:0021545~cranial nerve development                                                         | 2  | 0,088793305 | SMO, GLI3                                                                                                                                                                                                                                 |
| INTERPRO        | IPR017970:Homeobox, conserved site                                                           | 4  | 0,089637729 | IRX3, DLX5, GBX2, ALX4                                                                                                                                                                                                                    |
| GOTERM_BP_FAT   | GO:0048736~appendage development                                                             | 3  | 0,090008941 | DLX5, ALX4, GLI3                                                                                                                                                                                                                          |
| GOTERM_BP_FAT   | GO:0060173~limb development                                                                  | 3  | 0,090008941 | DLX5, ALX4, GLI3                                                                                                                                                                                                                          |
| UP_SEQ_FEATURE  | domain:EGF-like 1                                                                            | 3  | 0,092009394 | ASTN2, MEGF11, MEGF10                                                                                                                                                                                                                     |
| INTERPRO        | IPR001356:Homeobox                                                                           | 4  | 0,092301117 | IRX3, DLX5, GBX2, ALX4                                                                                                                                                                                                                    |
| UP_SEQ_FEATURE  | domain:EGF-like 9                                                                            | 2  | 0,093112103 | MEGF11, MEGF10                                                                                                                                                                                                                            |
| UP_SEQ_FEATURE  | domain:FZ                                                                                    | 2  | 0,093112103 | SMO, CPZ                                                                                                                                                                                                                                  |
| GOTERM_BP_FAT   | GO:0048678~response to axon injury                                                           | 2  | 0,093245125 | ERBB2, MAP1B                                                                                                                                                                                                                              |
| SP_PIR_KEYWORDS | wnt signaling pathway                                                                        | 3  | 0,093604184 | RSP01, WNT9B, CPZ                                                                                                                                                                                                                         |
| INTERPRO        | IPR012287:Homeodomain-related                                                                | 4  | 0,094997406 | IRX3, DLX5, GBX2, ALX4                                                                                                                                                                                                                    |
| GOTERM_BP_FAT   | GO:0045860~positive regulation of protein kinase activity                                    | 4  | 0,095197844 | ADCY5, ERBB2, KITLG, PDGFC                                                                                                                                                                                                                |
| SP_PIR_KEYWORDS | ion transport                                                                                | 6  | 0,096668725 | ACCN4, CACNA1G, CACNA1H, SLC30A2, HCN4, KCNH2                                                                                                                                                                                             |
| GOTERM_MF_FAT   | GO:0019838~growth factor binding                                                             | 3  | 0,097111557 | HTRA1, ERBB2, IGFBP3                                                                                                                                                                                                                      |
| GOTERM_BP_FAT   | GO:0001569~patterning of blood vessels                                                       | 2  | 0,097675523 | GBX2, CXCL12                                                                                                                                                                                                                              |
| GOTERM_BP_FAT   | GO:0021532~neural tube patterning                                                            | 2  | 0,097675523 | SMO, GBX2                                                                                                                                                                                                                                 |
| UP_SEQ_FEATURE  | compositionally biased region:Poly-Pro                                                       | 5  | 0,098302557 | HRH3, GBX2, KCNH2, LRP3, CECR6                                                                                                                                                                                                            |
| SMART           | SMO0261:FU                                                                                   | 2  | 0,098313722 | RSP01, ERBB2                                                                                                                                                                                                                              |
| GOTERM_CC_FAT   | GO:0005891~voltage-gated calcium channel complex                                             | 2  | 0,098412963 | CACNA1G, CACNA1H                                                                                                                                                                                                                          |
| GOTERM_BP_FAT   | GO:0060429~epithelium development                                                            | 4  | 0,099103068 | RET, DLX5, TFAP2A, GLI3                                                                                                                                                                                                                   |
| GOTERM_BP_FAT   | GO:0030005~cellular di-, tri-valent inorganic cation homeostasis                             | 4  | 0,099103068 | HRH3, CCKBR, CACNA1G, CXCL12                                                                                                                                                                                                              |
